1 **Protein-lipid interaction at low pH induces oligomerisation of the**  
2 **MakA cytotoxin from *Vibrio cholerae***

3

4 Aftab Nadeem<sup>1,2,3\*</sup>, Alexandra Berg<sup>1,2,3,4</sup>, Hudson Pace<sup>2,5,6</sup>, Athar Alam<sup>2,3,5</sup>, Eric  
5 Toh<sup>1,2,3</sup>, Jörgen Ådén<sup>2,7</sup>, Nikola Zlatkov<sup>1,2,3</sup>, Si Lhyam Myint<sup>1,2,3</sup>, Karina Persson<sup>2,7</sup>,  
6 Gerhard Gröbner<sup>2,7</sup>, Anders Sjöstedt<sup>2,3,5</sup>, Marta Bally<sup>2,5,6</sup>, Jonas Barandun<sup>1,2,3,4</sup>, Bernt  
7 Eric Uhlin<sup>1,2,3\*</sup>, Sun Nyunt Wai<sup>1,2,3\*</sup>

8

9 <sup>1</sup>Department of Molecular Biology, Umeå University, SE-90187 Umeå, Sweden.

10 <sup>2</sup>Umeå Centre for Microbial Research (UCMR), Umeå University, SE-90187 Umeå, Sweden.

11 <sup>3</sup>The Laboratory for Molecular Infection Medicine Sweden (MIMS), Umeå University, SE-90187  
12 Umeå, Sweden.

13 <sup>4</sup>Science for Life Laboratory (SciLifeLab), Department of Molecular Biology, Umeå University,  
14 SE-90187 Umeå, Sweden

15 <sup>5</sup>Department of Clinical Microbiology, Umeå University, SE-90185, Umeå, Sweden.

16 <sup>6</sup>Wallenberg Centre for Molecular Medicine, Umeå University, SE-90185, Umeå, Sweden.

17 <sup>7</sup>Department of Chemistry, University of Umeå, SE-901 87, Umeå, Sweden

18

19

20 Corresponding authors: Aftab Nadeem, e-mail: [aftab.nadeem@umu.se](mailto:aftab.nadeem@umu.se)

21 Bernt Eric Uhlin, e-mail: [bernt.eric.uhlin@umu.se](mailto:bernt.eric.uhlin@umu.se)

22 Sun Nyunt Wai, e-mail: [sun.nyunt.wai@umu.se](mailto:sun.nyunt.wai@umu.se)

23

24 Short title: pH-dependent cytolytic MakA activity

25

26

27

28

29

30

31

32

33

## 34 **Abstract (150 words)**

35

36 Many pathogenic bacteria produce protein toxins that target and perturb host cell  
37 membranes. The secreted  $\alpha$ -pore-forming toxins ( $\alpha$ -PFTs) cause membrane damage  
38 via pore formation. This study demonstrates a remarkable, hitherto unknown  
39 mechanism by an  $\alpha$ -PFT protein from *Vibrio cholerae*. As part of the MakA/B/E tripartite  
40 toxin, MakA is involved in membrane pore formation similar to other  $\alpha$ -PFTs. In  
41 contrast, MakA protein alone induces tube-like structures in the acidic lysosomal host  
42 cell compartment. *In vitro* studies unravel the dynamics of tubular growth, which occur  
43 in a pH-, lipid- and concentration-dependent manner. A 3.7-Å cryo-electron microscopy  
44 structure of MakA filaments reveals a unique protein-lipid superstructure. In its active  
45  $\alpha$ -PFT conformation, MakA embeds its transmembrane helices into a thin annular lipid  
46 bilayer and spirals around a central cavity. Our study provides molecular insights into  
47 a novel tubulation mechanism of an  $\alpha$ -PFT protein, revealing a new mode of action by  
48 a secreted bacterial toxin.

49

## 50 **Introduction**

51 Several bacterial protein toxins are known to interact directly with target cell  
52 membranes by binding specific receptors, lipids or proteins on host cell membranes<sup>1,2</sup>.  
53 Both extracellular and intracellular bacterial pathogens produce and secrete host  
54 membrane-attacking pore-forming toxins (PFTs) to counteract host defenses, to  
55 promote colonization and spread, and to kill other bacteria<sup>3,4</sup>. PFTs can be categorized  
56 into two main groups,  $\alpha$ -PFTs and  $\beta$ -PFTs, based on whether the secondary structure  
57 of the membrane-penetrating domain contains  $\alpha$ -helices or  $\beta$ -barrels, respectively<sup>3</sup>.  
58 Generally, PFTs are secreted from bacteria in a monomeric, soluble form. Upon  
59 recognition and binding to the target cell membrane, the toxins undergo a  
60 conformational change, interact with the membrane, dimerize, and oligomerize,  
61 leading to the formation of membrane pores<sup>5</sup>.

62

63 *Vibrio cholerae*, a Gram-negative bacterium, is the causal organism of the diarrheal  
64 disease cholera<sup>6</sup>. Cholera toxin (CT) and toxin co-regulated pilus (TCP) are the main  
65 virulence factors of *V. cholerae* that cause disease in mammalian hosts<sup>7,8</sup>. Most

66 environmental *V. cholerae* isolates do not produce CT and TCP<sup>9</sup>. Nevertheless, these  
67 bacteria are considered pathogenic since they have been associated with secretory  
68 diarrhea and may cause wound infections and sepsis<sup>10</sup>. *V. cholerae* strains lacking the  
69 cholera toxin-encoding genes often contain a set of genes coding for other secreted  
70 virulence factors, including hemolysin, hemagglutinin protease, RTX toxin, and  
71 multiple lipases that jointly may play a role in pathogenesis<sup>10</sup>.

72

73 Using *Caenorhabditis elegans* and *Danio rerio* (zebrafish) as host models for bacterial  
74 predatory interactions and infection in aqueous environments, respectively, we  
75 obtained evidence for a new *V. cholerae* cytotoxin denoted MakA (motility-associated  
76 killing factor A)<sup>11</sup>. The *V. cholerae* gene *makA* (*vca0883*) is localized in a gene cluster  
77 together with *makC* (*vca0881*), *makD* (*vca0880*), *makB* (*vca0882*) and *makE*  
78 (*vca0884*). This gene cluster has been found in different *V. cholerae* strains, including  
79 CT-negative isolates<sup>11,12,13</sup>. The crystal structure of MakA revealed that it belongs to  
80 the ClyA  $\alpha$ -PFT family<sup>11</sup>, named after the potent, one-component, pore-forming toxin  
81 ClyA which is expressed from a monocistronic operon in *E. coli*<sup>14,15</sup>. Our recent studies  
82 of the proteins encoded by the *mak* genes in *V. cholerae* demonstrated that MakA can  
83 form a tripartite cytolytic complex with MakB and MakE, whereas neither of the three  
84 proteins display cytolytic activity on their own<sup>13</sup>. Other family members of  $\alpha$ -PFT are  
85 found among the bipartite toxins from *Yersinia enterocolitica* (YaxAB)<sup>16,17</sup> and  
86 *Xenorhabdus nematophila* (XaxAB)<sup>17</sup>, as well as among the tripartite toxins from  
87 *Bacillus cereus* (NheABC and HblL<sub>1</sub>L<sub>2</sub>B)<sup>18</sup>, *Aeromonas hydrophila* (AhlABC)<sup>19</sup> and  
88 *Serratia marcescens* (SmhABC)<sup>20</sup>. The bipartite and tripartite PFTs require the  
89 combined action of all protein partners to induce pore formation in the target  
90 membranes, and there is evidence that protein interactions occurs in a specific order  
91 for maximum cytolytic activity<sup>19,20,13</sup>. However, there are still questions about how many  
92 molecules of each subunit protein are required to form a pore, how they interact with  
93 each other, how structural conformational changes occur, and how protein moieties  
94 are involved in the interaction with the host membrane. In addition, it remains possible  
95 that some of the subunit proteins can be separately released from the bacteria and  
96 thereby exhibit biological effects on their own. Secretion of the MakA/B/E proteins from  
97 *V. cholerae* was shown to be facilitated via the bacterial flagellum<sup>11,13</sup>. However, about  
98 10% of MakA was secreted from *V. cholerae* lacking the flagellum suggesting an

99 alternative route of secretion, in contrast to MakB and MakE, which displayed a more  
100 definitive flagellum-dependent secretion<sup>11,13</sup>.

101  
102 Our earlier studies with MakA and cultured mammalian cells showed that the protein  
103 binds to the target cell membrane and, upon internalization, may accumulate in the  
104 endolysosomal membrane, causing lysosomal dysfunction, induction of autophagy  
105 and apoptotic cell death<sup>21,22</sup>. Moreover, MakA can modulate host cell autophagy in a  
106 pH-dependent manner<sup>23</sup>.

107  
108 The present study aimed to further characterize the mechanism(s) behind MakA-  
109 induced lysosomal membrane tubulation and the pH-dependent molecular  
110 interaction(s) between MakA and host cell membranes. We found that under low pH  
111 conditions, MakA bound to purified lysosomes and to liposomes prepared from total  
112 epithelial cell lipid extracts (ECLE). The insertion of MakA into lysosomes and ECLE  
113 liposomes resulted in the formation of tubular assemblies. Cryo-electron microscopy  
114 (cryo-EM) analysis of these assemblies revealed an unusual helical structure formed  
115 by MakA and lipid spirals. The observed structure revealed that MakA monomers  
116 adopted conformational arrangements typical of active membrane-bound  $\alpha$ -PFTs while  
117 they assembled into an atypical polymeric superstructure. Large structural  
118 rearrangements, presumably induced by the lowered pH, were necessary for the  
119 transition from the inactive soluble form to the extended active toxin form. Interaction  
120 of these MakA structures with cell membranes could lead to cell death in the *in vitro*  
121 setting. MakA is the first *V. cholerae* protein that engages target membranes to form  
122 nanotubes by polymerizing as a helical structure together with a lipid spiral.

123

## 124 **Results**

### 125 **pH-dependent formation of tubular structures in lysosomes and on cell** 126 **membranes by MakA**

127 In recent *in vitro* studies with epithelial cells, we found that internalized MakA protein  
128 accumulated in the acidic endolysosomal compartment where it caused formation of  
129 tube-like structures and induced lysosomal permeability<sup>22</sup>. Our findings prompted us  
130 to examine how the observed lysosomal tubulation and lysosomal dysfunction might  
131 be caused by MakA. Upon treatment of Caco-2 cells with MakA (250 nM, 18 h), we

132 observed co-localization of the Alexa568-labeled MakA (Alexa568-MakA) with GFP-  
133 LAMP1 or lysotracker in tubular structures (**Fig. 1a and Supplementary Fig. 1a**). The  
134 tubulation in the lysosomes was further confirmed by transmission electron microscopy  
135 (TEM) of lysosomes isolated from MakA-treated HCT8 cells (**Fig. 1b**). To investigate  
136 if MakA can also induce tubulation of lysosomes outside the intracellular environment,  
137 we purified lysosomes from untreated HCT8 cells and exposed them to native MakA  
138 or to Alexa568-MakA. Both confocal microscopy and TEM analysis revealed  
139 aggregation and tubulation of lysosomes at pH 5.0 (**Fig. 1c-d**). In addition, a majority  
140 of the lysosomes showed well-organized tubulation when exposed to MakA at pH 6.5  
141 (**Fig. 1d**). In contrast, we did not observe any MakA-induced tubular structures in  
142 lysosomes at pH 7.0 (**Fig. 1d**). Western blot analysis confirmed pH-dependent binding  
143 of MakA to lysosomes (**Fig. 1e**). Alexa568-MakA was subsequently shown to bind  
144 epithelial cells in a pH-dependent manner (**Fig. 1f-g**). To determine the kinetics of  
145 MakA binding to the target cells, HCT8 cells were exposed to Alexa568-MakA at pH  
146 5.0, and live-cell imaging was performed using spinning disc confocal microscopic  
147 analysis. Consistent with our earlier findings<sup>21</sup>, we observed accumulation of  
148 Alexa568-MakA on the plasma membrane, including filipodia-rich tubular structures, in  
149 a time-dependent manner (**Fig. 1h and Supplementary Fig. 1b-c**). The time scale of  
150 MakA binding to individual HCT8 cells ranged from ~40 minutes to 4 hours after  
151 Alexa568-MakA treatment (**Fig. 1f-h and Supplementary Fig. 1b-c**). Ultimately,  
152 Alexa568-MakA was detected on the plasma membrane of the entire cell population,  
153 with most cells positive for tubular structures protruding out from the plasma membrane  
154 (**Fig. 1f and 1h**). Taken together, these results suggest that MakA can cause tubulation  
155 of both endolysosomal membranes and plasma membranes in a pH-dependent  
156 manner.

157

### 158 **pH-dependent epithelial cell toxicity and formation of tubular structures on** 159 **erythrocytes by MakA**

160 To further assess the effect of pH on the binding of MakA to HCT8 epithelial cells, we  
161 performed Western blot analysis using anti-MakA antiserum (**Fig. 2a**). We observed  
162 that MakA bound to the cells in a pH-dependent manner, and moreover, that there  
163 seemed to be a pH-dependent formation of stable MakA oligomers bound to the  
164 epithelial cells. To determine if MakA binding and oligomerization at the target cell  
165 membrane correlated with cytotoxic effect, HCT8 cells were exposed to MakA, and cell

166 toxicity was quantified by a propidium iodide uptake assay using flow cytometry and  
167 fluorescence microscopy (**Fig. 2b and Supplementary Fig. 2a**). In addition to causing  
168 pH-dependent toxicity of HCT8 cells, MakA was similarly toxic to other colon cancer  
169 cells, Caco-2 and HCT116 cells, as assessed by the MTS cell viability assay  
170 (**Supplementary Fig. 2b**).

171  
172 Erythrocytes are widely used as a cell model to investigate the cytolytic activity of the  
173 toxins that belong to the ClyA pore-forming toxins family<sup>14,17,18,24,25</sup>. To test if pH-  
174 dependent binding and oligomerization of MakA may cause hemolysis of erythrocytes,  
175 human erythrocytes were exposed to increasing concentrations of MakA at different  
176 pH conditions for either 90 min or 5 h (**Fig. 2c**). When erythrocytes were exposed to  
177 MakA at pH 5.0, hemolysis was observed in a concentration dependent manner within  
178 90 min (**Fig. 2c**). In contrast, MakA failed to induce hemolysis of erythrocytes at pH 6.5  
179 or pH 7.4 during the 90 min treatment. A detectable, but low level of hemolysis was  
180 observed after 5 h with erythrocytes exposed to MakA at pH 6.5 (**Fig. 2c**). With  
181 confocal microscopy, we observed pH-dependent binding of Alexa568-MakA to  
182 erythrocytes. A majority of erythrocytes at pH 5.0 and 6.5 were covered by Alexa568-  
183 MakA whereas there was virtually no MakA binding observed at pH 7.4 (**Fig. 2d and**  
184 **Supplementary Fig. 2c**). Notably, we detected the presence of tubular structures in  
185 association with MakA at the red blood cell surface, as shown by a maximum 3D  
186 projection of the z-stack images of erythrocytes (**Fig. 2e**). The presence of MakA-  
187 induced tubular structures on the surface of erythrocytes was further observed by TEM  
188 and scanning electron microscopy (SEM) (**Fig. 2f-g**). Together, these results suggest  
189 that MakA could accumulate in a pH-dependent manner at the surface of both epithelial  
190 cells and erythrocytes, thereby inducing formation of tubular structures that ultimately  
191 might lead to cell lysis.

192

### 193 **MakA induction of tubular structures on liposomes lacking other proteins**

194 To investigate if tubulation of host membranes in response to MakA would require a  
195 specific membrane protein or receptor, we created protein- and cytosol-free liposomes  
196 using an epithelial cell total lipid extract (ECLE) isolated from HCT8 cells. After addition  
197 of MakA, the liposomes were pelleted by centrifugation and the presence of MakA in  
198 either the pellet or the supernatant was detected by Western blot analysis  
199 (**Supplementary Fig. 3a**). The results indicated that more MakA was associated with



200 the liposomes at pH 5.0 and 6.5 than at pH 7.4. The interaction between MakA and  
201 ECLE liposomes at pH 6.5 was quantified by surface plasmon resonance (SPR)  
202 analysis (**Fig. 3a**). MakA displayed significant interaction with ECLE liposomes, with  
203 an estimated  $K_D$  of 49.2 nM. Importantly, MakA at the highest tested concentration  
204 (200 nM) failed to interact with the liposomes prepared from zwitterionic 1-palmitoyl-2-  
205 oleoyl-sn-glycero-3-phosphocholine (POPC), used as a negative control (**Fig. 3a**).

206  
207 To determine the effect of pH on MakA's conformational properties, the protein was  
208 subjected to circular dichroism (CD) spectroscopy analysis at different pH in the  
209 absence or presence of ECLE liposomes (**Fig. 3b-c**). In the absence of liposomes, the  
210 CD spectra indicated a decrease in the  $\alpha$ -helical content of the protein when in the  
211 acidic environment. This decrease in  $\alpha$ -helical content of MakA was restored when  
212 ECLE liposomes were present, suggesting that liposomes somehow stabilized the  
213 structure of MakA (**Fig. 3b-c and Supplementary Table 1**). TEM analysis of MakA at  
214 different pH indicated that it formed oligomeric structures in a pH-dependent manner  
215 (**Supplementary Fig. 3b**).

216  
217 Further examination by TEM addressed if there were morphological changes in the  
218 ECLE liposomes upon exposure to increasing concentrations of MakA at pH 6.5 (**Fig.**  
219 **3d and Supplementary Fig. 3c**). Similar to the tubulation observed for the target cell  
220 membranes and lysosomes, MakA triggered tubulation of the ECLE liposomes in a  
221 concentration-dependent manner (**Supplementary Fig. 3c**). Concomitant with the  
222 assembly of tubular structures emanating from the liposomes, the size of the liposomes  
223 appeared to shrink as the tubules grew up to several micrometers in length. Ultimately,  
224 the entire liposome seemed to be transformed into long tubules (**Fig. 3h and**  
225 **Supplementary Fig. 3c-e**). The tubulation of ECLE liposomes was also observed by  
226 confocal microscopy upon treatment with Alexa568-labeled MakA (**Supplementary**  
227 **Fig. 3d-e**). In the same population of small liposome particles, we also detected  
228 Alexa568-MakA-positive large lipid vesicles (5-10  $\mu\text{m}$  in size, less than 1% of the entire  
229 liposome fraction). The z-stack projection suggested that the whole lipid vesicle was  
230 decorated with a bundle of fluctuating tubules (**Supplementary Fig. 3e**). To further  
231 assess whether or not any protein or glycolipid receptor mediated the observed  
232 membrane tubulation by MakA, liposomes were prepared from a well-defined synthetic  
233 lipid mixture (SLM); whose composition was inspired by the distribution of lipids found

234 in the plasma membrane of HeLa cells<sup>26</sup>. Tubulation of the SLM liposomes by MakA  
235 was observed by TEM (**Fig. 3d**). In addition to the tubular structures, we observed a  
236 large number of well-organized, star-shaped oligomeric particles of MakA among the  
237 ECLE liposomes (**Supplementary Fig. 3c**). Furthermore, the presence of MakA  
238 protein in the tubular structures was evidenced by immunogold staining using MakA-  
239 specific antibodies (**Fig. 3e**). By fluorescence microscopy we were able to visualize  
240 tube growth originating from a supported lipid bilayer (SLB) prepared from SLM  
241 liposomes containing the fluorescent lipid Texas Red-DHPE, demonstrating that the  
242 tubes also contain lipids from the SLB (**Fig. 3f and Movie 1**).

243  
244 We next investigated the kinetics of MakA protein-lipid tubulation. Using fluorescence  
245 microscopy, we found that administering Alexa568-MakA to a SLB prepared from SLM  
246 liposomes prompted a significant and highly dynamic membrane remodeling (**Fig. 3g**  
247 **and Movie 2**). Within 10 minutes, Alexa568-MakA binding to the SLBs resulted in  
248 formation of MakA-associated tubules of various sizes (**Fig. 3g**). Based on these  
249 findings, we propose a schematic model for how the MakA-liposome interaction can  
250 result in the formation of the observed protein-lipid tubular structures (**Fig. 3h**). At pH  
251 6.5 or lower, MakA may adopt a conformation that allows the protein to insert into the  
252 lipid membrane in the form of an oligomer assembly that can start to spiral around the  
253 lipids of the membrane leading to formation of a growing tube structure. Concomitantly  
254 the size of the vesicle appear to shrink, and the tube may grow up to several  
255 micrometers in length. Our results suggest that the MakA-lipid tubulation can occur  
256 without the involvement of other proteins or some specific protein receptor under the  
257 pH conditions tested.

258

### 259 **Structure of the MakA filament**

260 We used helical reconstruction to solve the cryo-EM structure of a MakA filament  
261 assembled *in vitro* in the presence of ECLE liposomes at pH 6.5 and high protein  
262 concentrations (**Fig. 4a and Supplementary Fig. 4**). An initial 2D classification  
263 allowed us to identify repetitive elements and measure a helical repeat distance of  
264 ~216 Å (**Fig. 4b and Supplementary Fig. 5a**). A subsequent investigation of the layer  
265 line distances in a collapsed power spectrum of selected well-resolved class averages  
266 confirmed this distance (**Supplementary Fig. 5b**). Next, we performed a preliminary  
267 3D refinement of filament segments from well-defined 2D class averages without



268 imposing symmetry (**Supplementary Fig. 4**). This volume was visually inspected to  
269 deduce the helical symmetry parameters (**Supplementary Fig. 5c-d**). One repeating  
270 element of the right-handed spiral consists of 37 tetramers that complete five turns  
271 around the helical axis, spanning a length of 216.5 Å and a diameter of 322 Å. This  
272 arrangement results in an axial rise of 5.85 Å per subunit and a helical twist of 48.65°  
273 (**Fig. 4b and Supplementary Fig. 5d**). Application of these initially calculated values  
274 with local searches in a 3D refinement further optimized symmetry parameters,  
275 resulted in a cryo-EM map at an overall resolution of 3.7 Å (**Supplementary Table 1**  
276 **and Supplementary Fig. 6**). The obtained cryo-EM map features a well-resolved  
277 central transmembrane helix (TMH) region and a less well-resolved peripheral region  
278 (**Fig. 4c**). We isolated two MakA tetramers from the segments using signal subtraction  
279 and subjected the resulting particles to 3D classification and refinement to improve the  
280 peripheral density and connectivity. The clear connectivity of the obtained density map  
281 (**Fig. 4d and Supplementary Fig. 6e**) allowed for reliable secondary structure  
282 placement using the MakA soluble state crystal structure (PDB-6EZV<sup>11</sup>). High-  
283 resolution features in the helical reconstruction (**Fig. 4c and Supplementary Fig. 6f**)  
284 allowed for *de novo* model building of structural elements in the central region.  
285 However, due to continuous rotation along the filament axis, flexibility (**Supplementary**  
286 **Fig. 4**), and the conformational difference with respect to the crystal structure, the  
287 MakA tail domain structure is less reliable and modeled with poly-alanine secondary  
288 structure elements.

289  
290 MakA oligomerizes into a filamentous structure growing from or ending in membranous  
291 vesicles (**Fig. 4a, Supplementary Fig. 4**). The building blocks of this filament are  
292 formed by two MakA dimers (**Fig. 4b and 4d**) that organize into a pinecone-like  
293 architecture, spiraling around a central cavity (**Fig. 4c**). From the top view along the  
294 filament axis, the helix features a propeller-like structure with a weak, annular density  
295 embedded in between the blades formed by MakA (**Fig. 4c**). This density resembles  
296 lipid tails and contains some spherical features, which could be associated with  
297 phospholipid heads, suggesting the presence of a thin phospholipid bilayer that spirals  
298 around the central cavity of the filament (**Fig. 4c**). Interestingly, the annular density is  
299 located between the transmembrane helices of MakA (**Fig. 4d**), indicating that the  
300 active toxin form interacts with lipid vesicles and starts to oligomerize by internalizing  
301 membrane lipids.

302

303 **A significant conformational change is required to adopt the membrane-bound**  
304 **state**

305 The basic building block of the observed protein-lipid filament is formed by four MakA  
306 subunits in a membrane-bound active conformation (**Fig. 5a,b**). This conformation of  
307 MakA is significantly different from the previously reported soluble state structures  
308 resembling the inactive form (PDB-6DFP and PDB-6EZV<sup>11</sup>). In the soluble form, a C-  
309 terminal tail (res. 351-365, **Fig. 5c**, purple) inactivates the predicted transmembrane  
310 domains by forming a  $\beta$ -tongue, consisting of three  $\beta$ -sheets<sup>11</sup>, that shields the  
311 hydrophobic residues from the surrounding solvent. This shielding characteristic is  
312 well-described for the soluble form of the ClyA pore-forming toxin family, including  
313 ClyA, Hbl-B, NheA, and AhIB<sup>17,19,27-30</sup>. MakA undergoes a structural change  
314 comparable to the opening of a Swiss army knife blade when it shifts from a soluble  
315 inactive to a membrane-bound active state, where the helix bundle of the tail region  
316 represents the handle, the transition from the tail to the neck region forms two hinges,  
317 and the  $\beta$ -tongue together with 4 and 5 resembles the blade that folds out (**Fig. 5c**,  $\alpha 4$   
318 &  $\alpha 5$ ; light & dark green). Additionally, the  $\beta$ -tongue changes its secondary structure  
319 and, together with  $\alpha 4$  and  $\alpha 5/\alpha 6$ , forms two extended helices (**Fig. 5c**). This significant  
320 conformational change leads to the formation of two TMHs and a short loop region  
321 (res. 219-221) between  $\alpha 4$  and  $\alpha 5$ . Interestingly, despite certain similarities, all four  
322 copies of MakA adopt different conformations within the tetramer, indicated by MakA-  
323 1 to MakA-4 (**Fig. 4 and Fig. 5**). The most significant structural differences between  
324 the four MakA conformations can be observed in the neck and head domains,  
325 connected via a hinge with the tail domains (**Fig. 5c**). The hinge allows for different  
326 degrees of bending (opening up of the Swiss army knife), while the neck helices  $\alpha 4$   
327 and  $\alpha 5$  and the loop region (res. 219-221) display a high degree of plasticity. For the  
328 peripheral tail domain, two major conformations can be observed. In MakA-2 and  
329 MakA-4, this region superimposes well with the crystal structure, whereas helix  $\alpha 6$  of  
330 MakA-1 and MakA-3 moves by almost 10 Å to extend the length of  $\alpha 5$ . While the N-  
331 terminal helices of the stretched MakA states are reduced compared to those of the  
332 kinked MakA forms, the C-terminal  $\beta$ -strand (res. 351-365), covering the TMH in the  
333 soluble state, is disordered in all four subunits.

334

335

## 336 Discussion

337 Recent studies have revealed how different bacterial species, notably *B. cereus*, *A.*  
338 *hydrophila*, *S. marcescens* and *V. cholerae*, have the capability to produce structurally  
339 similar tripartite protein complexes that assemble on host cell membranes as pore  
340 structures that are cytolytic<sup>13,18-20</sup>. In the case of *V. cholerae*, it has become evident  
341 that the MakA component of the tripartite complex, when presented alone to  
342 mammalian cells, is effectively internalized and accumulates on endolysosomal  
343 membranes, leading to induction of autophagy and apoptotic cell death<sup>21-23</sup>. Herein,  
344 we show that MakA is able to produce a novel protein-lipid polymeric superstructure at  
345 low pH (6.5 or below) that perturbs host cell membranes.

346  
347 Several prokaryotic proteins are known to polymerize in the presence of a matrix such  
348 as a lipid membrane or DNA. This type of assembly is referred to as a collaborative  
349 filament<sup>31</sup>. In the presence of lipid membranes, collaborative filaments are assembled  
350 by a bridging protein and lipid on the membrane in a sequence-specific manner and  
351 by sensing membrane curvature<sup>31</sup>. It was demonstrated that membrane-mediated  
352 clustering of Shiga toxin molecules and the formation of tubular membrane  
353 invaginations are essential steps in the clathrin-independent Shiga toxin uptake  
354 process<sup>32</sup>. In earlier studies, pH-dependent membrane insertion and increased  
355 cytotoxic activity were demonstrated for different bacterial toxins, including anthrax  
356 toxin from *Bacillus anthracis*<sup>33</sup>, diphtheria toxin from *Corynebacterium diphtheriae*<sup>30</sup>,  
357 VacA from *Helicobacter pylori*<sup>33</sup>, perfringolysin from *Clostridium perfringens*<sup>34</sup>, and  
358 listeriolysin O from *Listeria monocytogenes*<sup>35</sup>. Recent research on the pre- and pore  
359 forms of mammalian pore-forming toxin, mammalian perforin 2 (mPFN2), provide  
360 interesting insights into the pore generation process. It was demonstrated that pre-  
361 pore-to-pore transformation occurs at an acidic pH, which is accomplished by a 180°  
362 rotation of the membrane attacking domain and  $\beta$ -hairpin P2 domains with respect to  
363 one another, allowing membrane insertion to take place<sup>34</sup>. Similar to these other toxins,  
364 a decrease in pH facilitated the MakA structural change comparable to the opening of  
365 a Swiss army knife blade when shifting from a soluble to a membrane-bound active  
366 state interaction with the lipid membrane. The pH-induced structural change  
367 potentiated the MakA-induced cytotoxic effect on the target cell under the conditions  
368 tested. Consistent with these results, we recently found that MakA co-localizes with  $\beta$ -

369 catenin, actin and the phosphatidic acid biosensor, PASS, in filipodia-rich  
370 structures<sup>21,22</sup>.

371  
372 Our *in vitro* analysis of the low-pH-induced interaction between MakA and host  
373 membranes included: purified lysosomes, cultured epithelial cells, red blood cells, and  
374 liposome models. In all model systems, we observed that low pH enhanced the activity  
375 of MakA, characterized by a striking tubulation of both purified lysosomes and  
376 liposomes prepared from epithelial cell total lipid extract. Furthermore, it was found  
377 that MakA formed tubular structures on liposomes independent of any specific protein  
378 receptor or energy-generating molecules, i.e., ATP or GTP, suggesting that at low pH  
379 the structural change and insertion of MakA itself was sufficient to trigger tubulation at  
380 the membrane surface. In contrast to some other PFTs that need cholesterol for  
381 oligomerization<sup>35-37</sup>, MakA could induce tubulation on liposomes obtained from lipid  
382 sources essentially lacking cholesterol, *i.e.* *E. coli* and *C. elegans*, showing that the  
383 pH-dependent tubulation of MakA can occur in the absence of cholesterol in the  
384 membrane. Bacterial cell membranes are typically devoid of cholesterol<sup>38</sup>, while the  
385 membranes of *C. elegans* are mostly composed of glycerophospholipids and  
386 sphingolipids, with trace quantities of cholesterol<sup>39</sup>. In addition, we observed that the  
387 presence of cholesterol was not required for the oligomerization of MakA in solution  
388 **(Supplementary Fig. 3b)**.

389  
390 Importantly, unlike Shiga toxin and cholera toxin, which insert into the membrane and  
391 cause inward-directed tubulations of artificial lipid membranes since toxin binding  
392 induces negative curvature of the plasma membrane<sup>40-42</sup>, MakA evidently could drive  
393 the rapid growth of tubules towards the extracellular space as shown with red blood  
394 cells **(Fig. 2g)**. We propose that the appearance of tubular structures in response to  
395 MakA was a direct consequence of MakA insertion into the membrane, which  
396 appeared to create the conditions for generating a positive curvature, as described  
397 previously for protein-lipid complexes and multi-anchoring polymers<sup>43,44</sup>.

398  
399 Our findings allowed us to propose a model for MakA oligomer assembly and its  
400 implications for pore formation. Within the oligomerized MakA filament, the TMHs line  
401 the inner cavity, interacting with lipids, which are intercalated both within the dimer  
402 interface and between the dimers in the helical spiral **(Fig. 4c and Fig. 5b)**. In the

403 context of pore-forming toxin systems, the initial insertion of one toxin component was  
404 described for XaxAB<sup>17</sup>, YaxAB<sup>16</sup>, and suggested for AhIC<sup>19</sup>. Considering that the TMHs  
405 of the MakA-tetramers harbor a lipid bilayer, it could be assumed that MakA initiates  
406 membrane insertion in a manner similar to its role in pore formation under neutral pH  
407 conditions when part of the tripartite MakA/B/E complex<sup>13</sup>. We hypothesize that under  
408 low-pH conditions, MakA transitions from inactive to the active stretched conformation  
409 and penetrates the membrane as a monomer. In the membrane bound state, the  
410 interaction of the head and tail domains of two monomers might lead to MakA dimer  
411 formation and subsequent oligomerization.

412  
413 The pronounced structural difference between two subunits forming a dimer, in the  
414 absence of the tripartite complex interaction partner, i.e., MakB or MakE, would reflect  
415 how MakA's plasticity nevertheless can structurally mimic the expected structure when  
416 involved in the tripartite cytolysin. First, one completely stretched monomer dimerizes  
417 with a monomer with a pronounced elbow-like kink from  $\alpha 3$  to  $\alpha 4$  in the transition from  
418 the tail to the neck region (**Fig. 5c**). Subsequently, the two dimers form a tetramer with  
419 the stretched and kinked MakA states associating with each other, respectively. The  
420 subsequent tetramerization followed by oligomerization does not result in pore  
421 formation, but helical growth and shearing off of lipids from vesicles and cell  
422 membranes at low pH. This process, which does not occur in the tripartite cytotoxin  
423 scenario under neutral pH conditions, depletes membranous structures of lipids and  
424 potentially causes cell lysis in a manner quite different from that of a *bona fide*  $\alpha$ -PFT  
425 cytolysin complex. Our findings with the *V. cholerae* MakA protein reveal an  
426 unexpected capability and remarkable mode of action of an individual  $\alpha$ -PFT toxin  
427 subunit.

428

## 429 **Materials and Methods**

### 430 **Chemical and Lipids**

431 Chloroform, formaldehyde, methanol, sodium citrate, Tween 20, Triton X-100 and  
432 Fluoromount were from Sigma (St Louis, MO, USA). Hoechst 33342 and LysoTracker  
433 were from Thermo Fisher Scientific (Waltham, MA, USA). Propidium iodide was from  
434 BD Biosciences (San Jose, CA). Protease inhibitor and phosphatase inhibitor,  
435 phosSTOP were from Roche (Roche AB, Solna, Sweden). All lipids were purchased

436 from Avanti Polar Lipids (Alabaster, AL, USA). Lipids: 1-palmitoyl-2-oleoyl-glycero-3-  
437 phosphocholine (POPS), 1,2-dioleoyl-sn-glycero-3-phosphoethanolamine (DOPE), 1-  
438 palmitoyl-2-oleoyl-sn-glycero-3-phospho-L-serine (POPS), Sphingomyelin from  
439 Porcine Brain (SM), Cholesterol from Ovine (Chol), L- $\alpha$ -phosphatidylinositol-4,5-  
440 bisphosphate from Porcine Brain (PIP2), and N-palmitoyl-sphingosine-1-  
441 {succinyl[methoxy(polyethylene glycol)5000]} (PEG5Kce). Lyophilized PIP2 lipids  
442 were dissolved in a mixture of chloroform: methanol (2:1) to a concentration of 1  
443 mg/mL. Next, they were protonated by addition of 0.5  $\mu$ L of 1 M HCl to 100  $\mu$ g of PIP2,  
444 kept at room temperature for 15 min and dried with nitrogen gas. The dried lipid was  
445 redissolved in chloroform: methanol (3:1) mixture to 1 mg/mL followed by drying again.  
446 Finally, the 100  $\mu$ g of PIP2 was redissolved in 100% chloroform to 1 mg/mL and stored  
447 at  $-20^{\circ}\text{C}$  until used for liposome production.

448

#### 449 **Mammalian cell culture**

450 Caco-2 (ATCC), HCT8 (ATCC) and HCT116 (ATCC) cells were cultured in RPMI-1640  
451 medium (Sigma-Aldrich) supplemented with 10% fetal bovine serum (FBS), 1%  
452 penicillin/streptomycin, and non-essential amino acids. Cells were cultured at  $37^{\circ}\text{C}$ ,  
453 5%  $\text{CO}_2$  and 90% humidity in 96-well plates overnight (for MTS cell viability assays),  
454 Coverslip bottom 8-well chamber slide (for confocal and spinning disc confocal  
455 microscopy) for 75-mm flasks (for lysosomes isolation), 24-well plates (for flow  
456 cytometry) and six-well plates (for Western blot analysis).

457

#### 458 **Antibodies**

459 Anti-MakA antiserum produced by GeneCust (1:20,000 dilution), anti-LAMP1 antibody  
460 (#9091) purchased from Cell Signaling (1:1000 dilution), and anti-beta-actin antibody  
461 (A2228) purchased from Sigma-Aldrich (1:5000 dilution) were used in this study.

462

#### 463 **Cloning and purification of MakA**

464 Cloning, overexpression, and purification of MakA have been previously reported<sup>11</sup>.  
465 AlexaFluor568 labeling of MakA was performed using an AlexaFluor568 protein  
466 labeling kit (Thermo Fisher) according to the manufacturer's instructions.

467

#### 468 **Isolation and treatment of intact epithelial cell lysosomes**



469 HCT8 cells were grown overnight in RPMI-1640 complete media (~pH 7.2). The  
470 following day cells were treated with MakA (250 nM, 18 h). At the end of treatment,  
471 lysosomes were purified from vehicle or MakA-treated HCT8 cells using Lysosome  
472 Isolation Kit (ab234047, Abcam), according to the manufacturer's instructions.

473

474 For the lysosome pull-down assay, intact lysosomes freshly isolated from HCT8 cells  
475 were diluted in three times their volume of freshly prepared binding buffer (120 mM  
476 sodium citrate, pH 5.0, pH 6.5 or pH 7.0), followed by incubation with MakA (20 µg/mL)  
477 at 37°C (60 min). These MakA-lysosome complexes were centrifuged at 21,000 x g  
478 (30 min, RT), pellets were washed in the respective binding buffer and resuspended in  
479 2X Laemmli buffer. Samples were run on an SDS-PAGE, and after electrophoresis,  
480 the samples were transferred to a nitrocellulose membrane. A Western blot analysis  
481 was performed using anti-MakA antiserum (1:20,000 dilution, overnight at 4°C) that  
482 was detected with HRP-conjugated goat anti-rabbit secondary antibodies. Detection of  
483 LAMP1, using anti-LAMP1 antibodies, was used as an internal loading control for  
484 lysosome pull-down experiments. The membranes were developed with a  
485 chemiluminescence reagent (Bio-Rad). Images were acquired using an ImageQuant™  
486 LAS 4000 instrument and processed using ImageJ-FIJI distribution<sup>45</sup>.

487

488 For confocal microscopy, intact lysosomes diluted in three times their volume of freshly  
489 prepared binding buffer (120 mM sodium citrate, pH 5.0, pH 6.5 or pH 7.0) were  
490 exposed to Alexa568-MakA (1 µM). To facilitate the binding, Alexa568-MakA and  
491 lysosomes were incubated in a 37°C incubator for 60 min. At the end of treatment,  
492 samples were visualized by a Leica SP8 inverted confocal system (Leica  
493 Microsystems) equipped with an HC PL APO 63x/1.40 oil immersion lens. Images were  
494 captured using LasX software (Leica Microsystems) and processed using ImageJ-FIJI  
495 distribution<sup>45</sup>.

496

#### 497 **Live cell spinning disk microscopy**

498 Live cell experiments were conducted in phenol-red-free IMDM media adjusted to pH  
499 5.0 supplemented with 10% FBS and 1 mM sodium pyruvate (Thermo Fisher Scientific)  
500 at 37°C in 5% CO<sub>2</sub>. Alexa568-MakA (500 nM) was added to HCT8 cells, and images  
501 were recorded every 1 min during a period of 120 min using a 63X lens and Zeiss  
502 Spinning Disk Confocal controlled by ZEN interface (RRID:[SCR\\_013672](#)) with an Axio

503 Observer Z1 inverted microscope, equipped with a CSU-X1A 5000 Spinning Disk Unit  
504 and an EMCCD camera iXon Ultra from ANDOR. Images were processed with Zeiss  
505 ZEN Lite and ImageJ-FIJI distribution<sup>45</sup>.

506

### 507 **Immunofluorescence**

508 Lysosomal tubulation was investigated by treating Caco-2 cells with Alexa568-MakA  
509 (250 nM, 18 h) in IMDM complete media (pH 7.2). After treatment, cells were  
510 subsequently counterstained for lysotracker (200 nM, 30 min) and Hoechst 33342 (2  
511  $\mu$ M, 30 min).

512

513 For confocal microscopy, HCT8 cells were loaded with the nuclear staining marker  
514 Hoechst 33342 (2  $\mu$ M, 30 min) and exposed to Alexa568-MakA (500 nM) in different  
515 pH-adjusted IMDM complete media for 4 h at 37°C in 5% CO<sub>2</sub>. Cells were visualized  
516 live using a Leica SP8 inverted confocal system (Leica Microsystems) equipped with  
517 an HC PL APO 63x/1.40 oil immersion lens. Images were captured using the LasX  
518 (Leica Microsystems) and processed using ImageJ – FIJI distribution<sup>45</sup>.

519

520 For the propidium iodide uptake experiment, HCT8 cells were treated with MakA (500  
521 nM, 4 h) in IMDM complete media (pH 5.0 or pH 7.4), followed by adding propidium  
522 iodide (0.5  $\mu$ g/mL, 30 min). Fluorescence and bright-field images were captured with  
523 a fluorescence microscope (Nikon, Eclipse Ti). Images were processed using the NIS-  
524 Elements (Nikon) and ImageJ – FIJI distribution<sup>45</sup>.

525

526 For Alexa568-MakA binding to erythrocytes, freshly prepared human erythrocytes  
527 (0.25% in PBS) were loaded into an 8-well chamber slide ( $\mu$ -Slide, ibidi), cells were  
528 allowed to adhere to the glass surface for 10 h, followed by buffer exchange to citrate  
529 buffer (pH 5.0, pH 6.5 or pH 7.4). The erythrocytes were exposed to Alexa568-MakA  
530 (500 nM) for 3 h at 37°C in 5% CO<sub>2</sub>. Cells were visualized using a Leica SP8 inverted  
531 confocal system (Leica Microsystems) equipped with an HC PL APO 63x/1.40 oil  
532 immersion lens. The maximum z-stack projection of the human erythrocytes treated  
533 with Alexa568-MakA (pH 6.5 in citrate buffer) was constructed using Leica LasX  
534 Software.

535

### 536 **Cell toxicity assay**

537 HCT8, Caco-2 and HCT116 cells were treated with increasing concentrations of MakA  
538 at a given pH at the indicated time point (4 h or 24 h). At the end of treatment, cells  
539 were incubated with MTS reagent (15 min) at 37°C in an incubator, and cell viability  
540 was quantified by measuring MTS absorbance on an Infinite M200 microplate reader  
541 (Tecan). Data were normalized to the vehicle-treated cells (pH 7.2) and expressed as  
542 a percentage of the control.

543  
544 For flow cytometry experiments, HCT8 cells were grown on a 24-well plate (8x10<sup>4</sup>/well,  
545 Tecan Group Ltd) overnight in IMDM complete media (pH 7.2). The following day, cells  
546 were treated with vehicle (Tris 20 mM) or MakA (500 nM, 4 h) in media adjusted to a  
547 given pH. At the end of treatment, cells were incubated with propidium iodide (0.5  
548 µg/mL) at 37°C for 30 min. Cellular uptake of propidium iodide in vehicle or MakA-  
549 treated cells was investigated by flow cytometry. Cellular uptake of propidium iodide  
550 was quantified and presented as mean fluorescence intensity (MFI) for the gated cells.

551  
552 **Human erythrocytes hemolysis assay**  
553 Freshly prepared human erythrocytes (0.25%) in citrate buffer (120 mM sodium citrate,  
554 pH adjusted to 5.0, 6.5 or 7.4) were added to a 96-well plate. The erythrocytes were  
555 treated with increasing concentrations of MakA at two different time points (90 min and  
556 5 h) at 37°C in 5% CO<sub>2</sub>. After centrifugation (500 x g), the supernatants were monitored  
557 spectrophotometrically for released hemoglobin by measuring absorbance at 545 nm  
558 to indicate red blood cell lysis. MakA-induced hemolysis of erythrocytes was  
559 normalized against erythrocytes treated with Triton X-100 (0.1%). Data were  
560 expressed as a percentage.

561  
562 **Scanning Electron Microscopy**  
563 Freshly prepared human erythrocytes (0.25%) were treated with MakA (500 nM, 90  
564 min) in citrate buffer (120 mM, pH 6.5). Samples were fixed with a fixative (1%  
565 glutaraldehyde + 0.1 M CaCo buffer + 3 mM MgCl<sub>2</sub>) in the microwave and washed  
566 twice with buffer (0.1 M CaCo buffer + 2.5% sucrose + 3 mM MgCl<sub>2</sub>). They were  
567 sedimented onto poly-L-lysine-coated coverslips for 1 h and subsequently dehydrated  
568 in series of graded ethanol solutions in the microwave. The samples were then dried  
569 to a critical point (Leica EM300). Subsequently, samples were coated with 2 nm of  
570 platinum (Quorum Q150T ES). Samples were imaged with field-emission scanning

571 electron microscopy (FESEM; Carl Zeiss Merlin) using an in-chamber (ETD)  
572 secondary electron detector at an accelerating voltage of 5 kV and probe current of  
573 150 pA.

574

### 575 **Extraction of epithelial cell lipids for liposome binding assays**

576 Lipids were extracted by the Folch method<sup>46</sup> from 10 x 150 cm<sup>2</sup> confluent flasks of  
577 HCT8 cells. Briefly, the HCT8 cell lipid extracts, dissolved in chloroform, were dried to  
578 a thin film under a nitrogen stream. The dried lipid yield was 12 mg. The lipid film (5 or  
579 10 mg/mL) was hydrated in HEPES buffer (10 mM HEPES, 150 mM NaCl, pH 7.4),  
580 citrate buffer (120 mM citrate buffer, pH 6.5) or (20 mM citric acid, 50 mM KCl, 0.1 mM  
581 EDTA, pH 4.5). The lipid suspension was extruded through polycarbonate membranes  
582 (0.1 µm) using the Avanti Mini-Extruder (Avanti Polar Lipids, Alabaster, AL, USA).

583

584 The liposome pull-down assay was performed as previously described<sup>21,47</sup>. Briefly, the  
585 liposome suspension was diluted in five times its volume of freshly prepared binding  
586 buffer (120 mM sodium citrate, pH 5.0, pH 6.5 or pH 7.4), followed by centrifugation at  
587 21,000 x g for 30 min at room temperature. The liposome pellet was resuspended in  
588 binding buffer followed by incubation with MakA (20 µg/mL). The liposome-protein  
589 mixtures were incubated at 37°C (60 min), followed by centrifugation at 21,000 x g at  
590 room temperature (30 min). To reduce the background, pellets were washed in the  
591 respective binding buffer two to three times. The resulting sample was loaded onto the  
592 SDS-PAGE, transferred to a nitrocellulose membrane and subjected to Western blot  
593 analysis using anti-MakA antiserum (1:10,000 dilution, overnight at 4°C). The MakA  
594 antibodies were detected with HRP-conjugated goat anti-rabbit secondary antibodies.  
595 The membranes were developed with a chemiluminescence reagent (Bio-Rad).  
596 Images were acquired using ImageQuant LAS 4000 instrument and processed using  
597 ImageJ - FIJI distribution<sup>45</sup>.

598

### 599 **Circular dichroism spectroscopy**

600 Far-UV Circular Dichroism (CD) analysis of MakA protein or MakA and ECLE liposome  
601 complexes was performed using Jasco J-720 Spectropolarimeter (Japan) at 25°C.  
602 Briefly, MakA (3 µM) alone or MakA (3 µM) and ECLE (5 mg/mL) were incubated  
603 overnight at 25°C in citrate buffer (5 mM) with varying pH. The spectra were recorded  
604 between 195-260 nm using 2-s response time, a 1 mm cuvette path length and a 2 nm

605 bandwidth. Data of an average of five repeated scans were used for graphical  
606 presentation and analyses.

607

### 608 **Liposome preparation**

609 Liposomes containing 0.5 mol% PEG5Kce, 5 mol% PIP2, 10 mol% SM, 10 mol%  
610 POPS, 15 mol% DOPE, 20 mol% Chol, and 39.5 mol% POPC (referred to herein as  
611 synthetic lipid mixture [SLM] liposomes) were prepared using the lipid film hydration  
612 and extrusion method. SLM+TxRed liposomes were created using the same protocol  
613 as above except for the addition of 1 mol% TxRed-DHPE and the corresponding  
614 reduction of POPC content to 38.5 mol%. The individual lipids dissolved in chloroform  
615 were mixed together, dried under nitrogen and then stored in a vacuum for a minimum  
616 of one hour. The dried lipid film was then rehydrated using a pre-heated citrate-  
617 potassium buffer at pH 4.5 (20 mM citric acid, 50 mM KCl, pH 4.5, 40°C) to a lipid  
618 concentration of 1 mg/mL. The solution was then extruded at ~40°C eleven times  
619 through a polycarbonate membrane with 100-nm pore size using an Avanti mini  
620 extruder. The liposomes were stored at 4°C until used.

621

### 622 **Fluorescence microscopy of SLBs**

623 Supported lipid bilayers (SLBs) were formed on glass coverslips. Coverslips were  
624 cleaned by boiling in 7X detergent (MP biochemicals) for 2 h followed by extensive  
625 rinsing in 18 MΩ water and blown dried with nitrogen. Clean coverslips were fitted with  
626 Poly(dimethylsiloxane) (PDMS) sheets containing 10 μm holes to create glass-  
627 bottomed wells. SLBs were made by adding 10 μL of 0.1 mg/mL of either SLM or  
628 SLM+TxRed liposomes to each well and incubating the wells at 37°C for 30 min before  
629 rinsing the wells with citrate-potassium buffer to remove excess liposomes. Wells were  
630 then extensively rinsed with citrate buffer at pH 6.5 (120 mM sodium citrate) prior to  
631 protein addition. Either Alexa568-MakA or unlabeled MakA diluted in citrate buffer at  
632 pH 6.5 was then added to a well to reach a final concentration of 3 μM. The SLB surface  
633 was monitored using a Nikon Eclipse Ti2-E inverted epifluorescence microscope  
634 equipped with a 60X objective multi-band pass filter cube 86012v2  
635 DAPI/FITC/TxRed/Cy5 (Nikon Corp.), Prime 95B sCMOS camera (Teledyne  
636 Photometrics), and Spectra III light source (Lumencor).

637

### 638 **Surface plasmon resonance**

639 To analyze the interaction of MakA with ECLE or POPC liposomes, L1 sensor chips  
640 and a Biacore 3000 instrument were used as previously described<sup>21</sup>. In brief, the ECLE  
641 or POPC liposomes were immobilized onto the cells of the L1 sensor chip surfaces at  
642 low flow rates of 2  $\mu$ L/min for 40 min, stabilized with 50 mM NaOH, and the successful  
643 surface coverage was tested by injecting Bovine Serum Albumin (BSA). After  
644 successful surface coverage, two-fold serially diluted MakA (diluted in the SPR running  
645 buffer (120 mM citrate buffer, pH 6.5) with increasing concentrations (0 to 200 nM) was  
646 injected for 120 sec at flow rates of 5  $\mu$ L/min. For the binding analysis with POPC  
647 liposomes, the maximum concentration of MakA (200 nM) was used. All experiments  
648 were repeated at least twice, and the backgrounds of control flow cells were subtracted  
649 from the experimental cells before final data processing. The binding affinities (KD)  
650 were determined from the concentration gradient experiments, and the binding  
651 responses at equilibrium were fit to a simple 1:1 steady-state affinity model using the  
652 global data analysis option available within the Scrubber 2 software  
653 (<http://www.biologic.com.au/scrubber.html>).

654

### 655 **Western blot analysis**

656 For Western blot analysis, HCT8 cells were grown on a 6-well slide ( $3 \times 10^5$ /well,  
657 Thermo Scientific) overnight. The pH of IMDM cell culture media supplemented with  
658 10% FBS and 1% penicillin/streptomycin was adjusted to either 5.0, 6.5, 7.4 or 8.0  
659 followed by treatment with an increasing concentration of MakA for 4 h. Cells were  
660 rinsed with ice-cold PBS to remove unbound MakA and lysed in ice-cold NP-40 cell  
661 lysis buffer (20 mM Tris-HCl pH 8, 0.25% Nonidet P-40, 10% glycerol, 0.5 mM EDTA,  
662 300 mM KCl, 0.5 mM EGTA, 1x phosSTOP, and protease inhibitor cocktail from  
663 Roche). After mixing with sample buffer, cell lysates were boiled for 5 min and  
664 separated by SDS-PAGE. The proteins were transferred to a nitrocellulose membrane  
665 and blocked with 5% skim milk in 0.1% PBST (RT, 1 h). The membranes were  
666 incubated with respective primary antibodies in 5% skim milk (4°C, overnight). After  
667 washing with PBST (0.1%), membranes were incubated with HRP-conjugated  
668 secondary antibodies in 5% skim milk (RT, 1 h). The membranes were developed with  
669 Immun-Star™ AP Chemiluminescence (Bio-Rad). Images were acquired using  
670 ImageQuant LAS 4000 instrument and processed using ImageJ - FIJI distribution<sup>45</sup>.

671

### 672 **Transmission electron microscopy**



673 Negative staining for lysosomes or liposomes was performed on glow discharged  
674 copper grids (300 mesh) coated with a thin carbon film (Ted Pella, Redding, CA). After  
675 adding 3  $\mu$ L sample to the grids, they were washed twice with MQ water and stained  
676 with 1.5% uranyl acetate solution (EMS [Hatfield, PA]), followed by MQ water washing.  
677 Grids were examined with Talos L120C, operating at 120 kV. Transmission electron  
678 micrographs (TEM) were acquired with a Ceta 16M CCD camera using TEM Image &  
679 Analysis software ver. 4.17 (FEI, Eindhoven, The Netherlands).

680

### 681 **Cryo-electron microscopy sample preparation and data collection**

682 The ECLE liposomes (10 mg/mL) were incubated with MakA (30  $\mu$ M) in binding buffer  
683 (120 mM sodium citrate, pH 6.5) for 60 min at 37°C. Quantifoil 2/1-200 grids were glow  
684 discharged before the addition of 3  $\mu$ L protein-liposome mixture. Grids were then flash-  
685 frozen in liquid ethane using an FEI Vitrobot (Thermo Fisher Scientific). Data collection  
686 was performed at the Umeå University Core Facility for Electron Microscopy (UCEM)  
687 on a Titan Krios (Thermo Fisher Scientific), operating at 300 kV and equipped with a  
688 Gatan K2 BioQuantum direct electron detector (Gatan, Inc.). Images were acquired  
689 using EPU (Thermo Fisher Scientific). A total of 2,476 movies, each with 40 frames  
690 over a total dose of 43 e-/Å<sup>2</sup>, and a 0.75 to 2.5  $\mu$ m defocus range at a 1.042 Å pixel  
691 size were collected.

692

### 693 **Cryo-EM data processing and helical reconstruction**

694 The MotionCorr implementation of RELION-3.1 was used for drift correction and dose  
695 weighting of the micrographs<sup>48</sup>. The contrast transfer function (CTF) was determined  
696 using CTFFIND-4.1.14 (ref.<sup>49</sup>), and empty or micrographs with poor CTF fits or low ice  
697 quality were removed after manual inspection, which reduced the total to 1,351  
698 micrographs (**Supplementary Fig. 4**). Helical reconstruction tools in RELION-3.1 (ref.  
699 <sup>50</sup>) were used for subsequent image processing. Filaments were selected manually  
700 using the helix picker in RELION-3.1 with an outcome of 13,784 picked start and  
701 endpoints. First, segments were extracted between the picked start and endpoints as  
702 2x binned data using a box size of 437 Å (210 pixels, 2.084 Å/px) with an inter-box  
703 distance (IBD) of 23 Å, resulting in 195'809 segments, which were subjected to 2D  
704 classification with 80 classes and a spherical mask of 360 Å. Classes displaying a  
705 straight filament with high-resolution features (152'961 segments) were refined without  
706 symmetry using a featureless cylinder (diameter 320 Å) generated with the helix

707 toolbox in RELION-3.1 (**Supplementary Fig. 4**). In parallel, a 2D classification was  
708 performed by extracting 65'241 segments from 2x binned data, applying a box size of  
709 646 Å (310 px, 2.084 Å/px), an IBD of 62 Å, and a spherical mask of 580 Å. The volume  
710 refined without symmetry and the 2D class averages obtained from large helical  
711 segments were used to determine the helical symmetry parameters. Diameter and  
712 repeat distance were visually analyzed and measured in a representative 2D class  
713 average in RELION-3.1 (**Fig. 4b and Supplementary Fig. 5a**). Additionally, the repeat  
714 distance was calculated from the corresponding collapsed power spectrum (layer-line  
715 distance-1) in SPRING-0.68 (ref. <sup>51</sup>) (**Supplementary Fig. 5b**). Next, to determine the  
716 helical twist and rise, the number of turns and subunits per repeat were counted from  
717 the initial reconstructed model (**Supplementary Fig. 5c-d**), and the handedness of the  
718 reconstruction was, after the subsequent high-resolution refinement described below,  
719 confirmed using the MakA crystal structure<sup>11</sup>.

720  
721 For the final reconstruction, 95'603 segments were extracted unbinned with 460-pixel  
722 boxes (479 Å) and an IBD of 46.56 Å. Subsequent 2D classification with a 432 Å  
723 spherical mask resulted in 65'485 segments that were 3D refined using a featureless  
724 cylinder as a template and a spherical mask of 360 Å. Local symmetry searches were  
725 performed to narrow down the helical symmetry by refining helical twist (48-50°) and  
726 rise (5.4-6 Å), yielding a map with an overall 4.1 Å resolution. Subsequent Bayesian  
727 polishing improved the resolution to 3.8 Å, and estimation of anisotropic magnification  
728 and CTF refinement resulted in a final map with an overall resolution of 3.7 Å  
729 (**Supplementary Fig. 6**). As the peripheral region was less well-resolved, a subsection  
730 of the structure was isolated via signal subtraction, centered in a 260-pixel box and  
731 subjected to 3D classification without symmetry and local searches with increasing  
732 sampling rate from 3.7°, 1.8°, and 0.9° angles. From the resulting three classes, further  
733 refinement of class 2 (56.8%) yielded a map of the two tetramers in isolation at an  
734 overall resolution of 4.1 Å with improved peripheral density (**Supplementary Fig. 4**,  
735 blue branch, **and Supplementary Fig. 6d,e**). As the resulting three classes showed  
736 different conformations of the MakA head region, we examined whether these  
737 conformations exist across the volume. Two subsequent 3D classifications into five  
738 classes, without image alignment but with local symmetry searches, first with all  
739 classes, then with the top class from the first run, showed a normal distribution of  
740 angles, ranging from 48.48° to 48.68° suggesting continuous motion/rotation along the

741 filament axis, which is most pronounced in the tail region (**Supplementary Fig. 4**, blue  
742 branch, lower right).

743

#### 744 **Model building, refinement, and validation**

745 To obtain an initial model of the tail domain, the MakA crystal structure (PDB-6EZV<sup>11</sup>)  
746 was rigid-body docked into the density map using Chimera<sup>52</sup> and Coot<sup>53</sup>. Regions  
747 where the density/model fit was poor (no density, difference in conformation) were  
748 trimmed. This included the C-terminal tail (res. 351-365) and the central region (res.  
749 ~160-260). Elements in the tail domain with poor density fit were rigid-body docked.  
750 The central region of the protein, which includes the neck and head, was built *de novo*  
751 in Coot<sup>53</sup>. The model was first refined against the asymmetric map of the two tetramers  
752 in isolation (4.1 Å) using phenix.real\_space\_refine (version 1.14-3260)<sup>54</sup>. Next, this  
753 model was rigid-body docked into the 3.7-Å helical map, two neighboring placeholder  
754 molecules were symmetry expanded to provide interaction interfaces, and refined with  
755 secondary structure restraints. The final model contains four MakA subunits with  
756 trimmed sidechains in the tail domain (N-terminus to 159, 281 to C-terminus,  
757 **Supplementary Fig. 6e,f**). To validate the final model, all atomic coordinates were  
758 displaced randomly by 0.5 Å, refined against half map 1, followed by calculating the  
759 Fourier-Shell Correlation coefficient of the resulting refined model, and half map 1 or  
760 half map 2 (ref<sup>55</sup>). Model statistics are presented in (**Supplementary Table S1**).

761

#### 762 **Map and model visualization**

763 Structure analyses and preparation of the figures were performed using PyMOL  
764 (Schrödinger) or UCSF ChimeraX<sup>56</sup>.

765

#### 766 **Statistical analysis**

767 The result from replicates is presented as mean ± s.e.m. or mean ± s.d. The statistical  
768 significance of different groups was determined by Student's t-tests (two-tailed,  
769 unpaired) or one-way ANOVA using Microsoft Excel or GraphPad Prism. \*p ≤ 0.05, \*\*p  
770 ≤ 0.01, ns = not significant.

771

772

773 **DATA AVAILABILITY**

774 The cryo-EM density maps have been deposited in the EM Data Bank with accession  
775 code EMD-13185 (MakA helical reconstruction) and EMD-13185-additional map 1 (two  
776 tetramers refined in isolation). Coordinates have been deposited in the Protein Data  
777 Bank under accession code PDB-7P3R.

778  
779

780 **References**

781

- 782 1 Geny, B. & Popoff, M. R. Bacterial protein toxins and lipids: pore formation or toxin  
783 entry into cells. *Biol Cell* **98**, 667-678, doi:10.1042/BC20050082 (2006).
- 784 2 Lemichez, E. & Barbieri, J. T. General aspects and recent advances on bacterial  
785 protein toxins. *Cold Spring Harb Perspect Med* **3**, a013573,  
786 doi:10.1101/cshperspect.a013573 (2013).
- 787 3 Los, F. C., Randis, T. M., Aroian, R. V. & Ratner, A. J. Role of pore-forming toxins in  
788 bacterial infectious diseases. *Microbiol Mol Biol Rev* **77**, 173-207,  
789 doi:10.1128/MMBR.00052-12 (2013).
- 790 4 Verma, P., Gandhi, S., Lata, K. & Chattopadhyay, K. Pore-forming toxins in infection  
791 and immunity. *Biochem Soc Trans*, doi:10.1042/BST20200836 (2021).
- 792 5 Bischofberger, M., Iacovache, I. & van der Goot, F. G. Pathogenic pore-forming  
793 proteins: function and host response. *Cell Host Microbe* **12**, 266-275,  
794 doi:10.1016/j.chom.2012.08.005 (2012).
- 795 6 Clemens, J. D., Nair, G. B., Ahmed, T., Qadri, F. & Holmgren, J. Cholera. *Lancet* **390**,  
796 1539-1549, doi:10.1016/S0140-6736(17)30559-7 (2017).
- 797 7 Kaper, J. B., Fasano, A. & Trucksis, M. *Toxins of Vibrio cholerae. In: Vibrio cholerae*  
798 *and cholera: Molecular to global perspectives.* (American Society for Microbiology  
799 Press, Washington, DC., 1994).
- 800 8 Taylor, R. K., Miller, V. L., Furlong, D. B. & Mekalanos, J. J. Use of phoA gene  
801 fusions to identify a pilus colonization factor coordinately regulated with cholera  
802 toxin. *Proc Natl Acad Sci U S A* **84**, 2833-2837, doi:10.1073/pnas.84.9.2833 (1987).
- 803 9 Rajpara, N. *et al.* Synergistic effect of various virulence factors leading to high  
804 toxicity of environmental *V. cholerae* non-O1/ non-O139 isolates lacking ctx gene :  
805 comparative study with clinical strains. *PLoS One* **8**, e76200,  
806 doi:10.1371/journal.pone.0076200 (2013).
- 807 10 Schwartz, K., Hammerl, J. A., Gollner, C. & Strauch, E. Environmental and Clinical  
808 Strains of *Vibrio cholerae* Non-O1, Non-O139 From Germany Possess Similar  
809 Virulence Gene Profiles. *Front Microbiol* **10**, 733, doi:10.3389/fmicb.2019.00733  
810 (2019).
- 811 11 Dongre, M. *et al.* Flagella-mediated secretion of a novel *Vibrio cholerae* cytotoxin  
812 affecting both vertebrate and invertebrate hosts. *Commun Biol* **1**, 59,  
813 doi:10.1038/s42003-018-0065-z (2018).
- 814 12 Tsou, A. M. & Zhu, J. Quorum sensing negatively regulates hemolysin  
815 transcriptionally and posttranslationally in *Vibrio cholerae*. *Infect Immun* **78**, 461-467,  
816 doi:10.1128/IAI.00590-09 (2010).
- 817 13 Nadeem, A. *et al.* A tripartite cytolytic toxin formed by *Vibrio cholerae* proteins with  
818 flagellum-facilitated secretion. *bioRxiv*, 2021.2006.2020.449157,  
819 doi:10.1101/2021.06.20.449157 (2021).

- 820 14 Oscarsson, J., Mizunoe, Y., Uhlin, B. E. & Haydon, D. J. Induction of haemolytic  
821 activity in *Escherichia coli* by the slyA gene product. *Mol Microbiol* **20**, 191-199,  
822 doi:10.1111/j.1365-2958.1996.tb02500.x (1996).
- 823 15 Oscarsson, J. *et al.* Molecular analysis of the cytolytic protein ClyA (SheA) from  
824 *Escherichia coli*. *Mol Microbiol* **32**, 1226-1238, doi:10.1046/j.1365-  
825 2958.1999.01435.x (1999).
- 826 16 Brauning, B. *et al.* Structure and mechanism of the two-component alpha-helical pore-  
827 forming toxin YaxAB. *Nat Commun* **9**, 1806, doi:10.1038/s41467-018-04139-2  
828 (2018).
- 829 17 Schubert, E., Vetter, I. R., Prumbaum, D., Penczek, P. A. & Raunser, S. Membrane  
830 insertion of alpha-xenorhabdylisin in near-atomic detail. *Elife* **7**,  
831 doi:10.7554/eLife.38017 (2018).
- 832 18 Sastalla, I. *et al.* The *Bacillus cereus* Hbl and Nhe tripartite enterotoxin components  
833 assemble sequentially on the surface of target cells and are not interchangeable. *PLoS*  
834 *One* **8**, e76955, doi:10.1371/journal.pone.0076955 (2013).
- 835 19 Wilson, J. S. *et al.* Identification and structural analysis of the tripartite  $\alpha$ -pore forming  
836 toxin of *Aeromonas hydrophila*. *Nature Communications* **10**, 2900,  
837 doi:10.1038/s41467-019-10777-x (2019).
- 838 20 Churchill-Angus, A. M. *et al.* Characterisation of a tripartite alpha-pore forming toxin  
839 from *Serratia marcescens*. *Sci Rep* **11**, 6447, doi:10.1038/s41598-021-85726-0 (2021).
- 840 21 Nadeem, A. *et al.* Phosphatidic acid-mediated binding and mammalian cell  
841 internalization of the *Vibrio cholerae* cytotoxin MakA. *PLoS Pathog* **17**, e1009414,  
842 doi:10.1371/journal.ppat.1009414 (2021).
- 843 22 Nadeem, A. *et al.* Suppression of beta-catenin signaling in colon carcinoma cells by a  
844 bacterial protein. *Int J Cancer*, doi:10.1002/ijc.33562 (2021).
- 845 23 Corkery, D. P. *et al.* *Vibrio cholerae* cytotoxin MakA induces noncanonical autophagy  
846 resulting in the spatial inhibition of canonical autophagy. *J Cell Sci*,  
847 doi:10.1242/jcs.252015 (2020).
- 848 24 Beecher, D. J. & Wong, A. C. Tripartite hemolysin BL from *Bacillus cereus*.  
849 Hemolytic analysis of component interactions and a model for its characteristic  
850 paradoxical zone phenomenon. *J Biol Chem* **272**, 233-239 (1997).
- 851 25 Wilson, J. S. *et al.* (Identification and structural analysis of the tripartite alpha-pore  
852 forming toxin of *Aeromonas hydrophila*). *Nat Commun* **10**, 2900, doi:10.1038/s41467-  
853 019-10777-x (2019).
- 854 26 Lorizate, M. *et al.* Comparative lipidomics analysis of HIV-1 particles and their  
855 producer cell membrane in different cell lines. *Cell Microbiol* **15**, 292-304,  
856 doi:10.1111/cmi.12101 (2013).
- 857 27 Ganash, M. *et al.* Structure of the NheA component of the Nhe toxin from *Bacillus*  
858 *cereus*: implications for function. *PLoS One* **8**, e74748,  
859 doi:10.1371/journal.pone.0074748 (2013).
- 860 28 Kovac, J. *et al.* Production of hemolysin BL by *Bacillus cereus* group isolates of dairy  
861 origin is associated with whole-genome phylogenetic clade. *BMC Genomics* **17**, 581,  
862 doi:10.1186/s12864-016-2883-z (2016).
- 863 29 Madegowda, M., Eswaramoorthy, S., Burley, S. K. & Swaminathan, S. X-ray crystal  
864 structure of the B component of Hemolysin BL from *Bacillus cereus*. *Proteins* **71**,  
865 534-540, doi:10.1002/prot.21888 (2008).
- 866 30 Wallace, A. J. *et al.* *E. coli* hemolysin E (HlyE, ClyA, SheA): X-ray crystal structure  
867 of the toxin and observation of membrane pores by electron microscopy. *Cell* **100**,  
868 265-276, doi:10.1016/s0092-8674(00)81564-0 (2000).



- 869 31 Ghosal, D. & Lowe, J. Collaborative protein filaments. *EMBO J* **34**, 2312-2320,  
870 doi:10.15252/embj.201591756 (2015).
- 871 32 Pezeshkian, W. *et al.* Membrane invagination induced by Shiga toxin B-subunit: from  
872 molecular structure to tube formation. *Soft Matter* **12**, 5164-5171,  
873 doi:10.1039/c6sm00464d (2016).
- 874 33 Koehler, T. M. & Collier, R. J. Anthrax toxin protective antigen: low-pH-induced  
875 hydrophobicity and channel formation in liposomes. *Mol Microbiol* **5**, 1501-1506,  
876 doi:10.1111/j.1365-2958.1991.tb00796.x (1991).
- 877 34 Ni, T. *et al.* Structure and mechanism of bactericidal mammalian perforin-2, an  
878 ancient agent of innate immunity. *Sci Adv* **6**, eaax8286, doi:10.1126/sciadv.aax8286  
879 (2020).
- 880 35 Sathyanarayana, P. *et al.* Cholesterol promotes Cytolysin A activity by stabilizing the  
881 intermediates during pore formation. *Proc Natl Acad Sci U S A* **115**, E7323-E7330,  
882 doi:10.1073/pnas.1721228115 (2018).
- 883 36 Gellings, P. S. & McGee, D. J. Arcanobacterium haemolyticum Phospholipase D  
884 Enzymatic Activity Promotes the Hemolytic Activity of the Cholesterol-Dependent  
885 Cytolysin Arcanolysin. *Toxins (Basel)* **10**, doi:10.3390/toxins10060213 (2018).
- 886 37 Rosado, C. J. *et al.* The MACPF/CDC family of pore-forming toxins. *Cell Microbiol*  
887 **10**, 1765-1774, doi:10.1111/j.1462-5822.2008.01191.x (2008).
- 888 38 Fiertel, A. & Klein, H. P. On sterols in bacteria. *J Bacteriol* **78**, 738-739,  
889 doi:10.1128/jb.78.5.738-739.1959 (1959).
- 890 39 Watts, J. L. & Ristow, M. Lipid and Carbohydrate Metabolism in *Caenorhabditis*  
891 *elegans*. *Genetics* **207**, 413-446, doi:10.1534/genetics.117.300106 (2017).
- 892 40 Chinnapen, D. J. *et al.* Lipid sorting by ceramide structure from plasma membrane to  
893 ER for the cholera toxin receptor ganglioside GM1. *Dev Cell* **23**, 573-586,  
894 doi:10.1016/j.devcel.2012.08.002 (2012).
- 895 41 Romer, W. *et al.* Shiga toxin induces tubular membrane invaginations for its uptake  
896 into cells. *Nature* **450**, 670-675, doi:10.1038/nature05996 (2007).
- 897 42 Safouane, M. *et al.* Lipid cosorting mediated by shiga toxin induced tubulation. *Traffic*  
898 **11**, 1519-1529, doi:10.1111/j.1600-0854.2010.01116.x (2010).
- 899 43 Campelo, F. Modeling morphological instabilities in lipid membranes with anchored  
900 amphiphilic polymers. *Journal of Chemical Biology* **2**, 65-80, doi:DOI  
901 10.1007/s12154-009-0020-z (2007).
- 902 44 Nadeem, A. *et al.* Protein receptor-independent plasma membrane remodeling by  
903 HAMLET: a tumoricidal protein-lipid complex. *Sci Rep* **5**, 16432,  
904 doi:10.1038/srep16432 (2015).
- 905 45 Schindelin, J. *et al.* Fiji: an open-source platform for biological-image analysis. *Nat*  
906 *Methods* **9**, 676-682, doi:10.1038/nmeth.2019 (2012).
- 907 46 Folch, J., Lees, M. & Sloane Stanley, G. H. A simple method for the isolation and  
908 purification of total lipides from animal tissues. *J Biol Chem* **226**, 497-509 (1957).
- 909 47 Julkowska, M. M., Rankenberg, J. M. & Testerink, C. Liposome-binding assays to  
910 assess specificity and affinity of phospholipid-protein interactions. *Methods Mol Biol*  
911 **1009**, 261-271, doi:10.1007/978-1-62703-401-2\_24 (2013).
- 912 48 Zivanov, J. *et al.* New tools for automated high-resolution cryo-EM structure  
913 determination in RELION-3. *Elife* **7**, doi:10.7554/eLife.42166 (2018).
- 914 49 Rohou, A. & Grigorieff, N. CTFFIND4: Fast and accurate defocus estimation from  
915 electron micrographs. *J Struct Biol* **192**, 216-221, doi:10.1016/j.jsb.2015.08.008  
916 (2015).
- 917 50 He, S. & Scheres, S. H. W. Helical reconstruction in RELION. *J Struct Biol* **198**, 163-  
918 176, doi:10.1016/j.jsb.2017.02.003 (2017).



- 919 51 Desfosses, A., Ciuffa, R., Gutsche, I. & Sachse, C. SPRING - an image processing  
920 package for single-particle based helical reconstruction from electron  
921 cryomicrographs. *J Struct Biol* **185**, 15-26, doi:10.1016/j.jsb.2013.11.003 (2014).  
922 52 Pettersen, E. F. *et al.* UCSF Chimera--a visualization system for exploratory research  
923 and analysis. *J Comput Chem* **25**, 1605-1612, doi:10.1002/jcc.20084 (2004).  
924 53 Emsley, P. & Cowtan, K. Coot: model-building tools for molecular graphics. *Acta*  
925 *Crystallogr D Biol Crystallogr* **60**, 2126-2132, doi:10.1107/S0907444904019158  
926 (2004).  
927 54 Adams, P. D. *et al.* PHENIX: a comprehensive Python-based system for  
928 macromolecular structure solution. *Acta Crystallogr D Biol Crystallogr* **66**, 213-221,  
929 doi:10.1107/S0907444909052925 (2010).  
930 55 Brown, A. *et al.* Tools for macromolecular model building and refinement into  
931 electron cryo-microscopy reconstructions. *Acta Crystallogr D Biol Crystallogr* **71**,  
932 136-153, doi:10.1107/S1399004714021683 (2015).  
933 56 Goddard, T. D. *et al.* UCSF ChimeraX: Meeting modern challenges in visualization  
934 and analysis. *Protein Sci* **27**, 14-25, doi:10.1002/pro.3235 (2018).  
935  
936

## 937 **ACKNOWLEDGMENTS**

938 This work was supported by grants from the Swedish Research Council (No. 2018-  
939 02914 to S.N.W.; No. 2016-05009 to K.P; No. 2019-01720 to B.E.U.; No. 2016-06963  
940 to G.G.), The Swedish Cancer Society (No. 2017-419 and No. 2020-711 to S.N.W.),  
941 The Kempe Foundations (No. JCK-1728 to S.N.W.; No. SMK-1756.2 and No. SMK-  
942 1553 to K.P.; No. JCK-1724 and No. SMK-1961 to B.E.U), and the Faculty of Medicine,  
943 Umeå University (Strategic Research Grant 2019-2021 to S.N.W.). M.B. was  
944 supported by the Knut and Alice Wallenberg Foundation. J.B. acknowledges funding  
945 from the Swedish Research Council (2019-02011), the European Research Council  
946 (ERC Starting Grant PoITube 948655), the SciLifeLab National Fellows program, and  
947 MIMS. We acknowledge the Protein expression and purification facility (PEP) at Umeå  
948 University for construct design and cloning. We acknowledge the facilities and  
949 technical assistance of the Umeå Core Facility Electron Microscopy (UCEM) and the  
950 Biochemical Imaging Center (BICU), Umeå University, a part of the National  
951 Microscopy Infrastructure NMI (VR-RFI 201600968 and VR-RFI 2019-00217). The  
952 CryoEM data were collected by UCEM, which is a node of the Swedish National Cryo-  
953 EM Facility, funded by the Knut and Alice Wallenberg Foundation, Erling-Persson  
954 Family Foundation, The Kempe Foundations, SciLifeLab, Stockholm University, and  
955 Umeå University.

956

## 957 **AUTHOR CONTRIBUTIONS**

958 A.N. performed confocal microscopy, transmission electron microscopy, cryo-electron  
959 microscopy sample preparation for data collection, flow cytometry and cell toxicity; K.P.  
960 purified protein; E.T. and S.L.M, assisted A.N. with Western blot. A.N., H.P., E.T., At.  
961 A. and M.B. performed liposome experiments. At. A., and J.Å., performed CD  
962 experiments. A.B. and J.B. performed cryo-EM data processing and analysis. N. Z.  
963 assisted A.N. with hemolytic assay and analyzed the *mak* operon. A.N. wrote the initial  
964 version of the manuscript. All authors read and commented on the manuscript. M.B.,  
965 K.P., A.S., G.G., B.E.U., and S.N.W. obtained the funding. A. N., M.B., K.P., B.E.U,  
966 and S.N.W. supervised the research and finalized the manuscript.

967

#### 968 **COMPETING INTERESTS STATEMENT**

969 S.N.W., B.E.U., A.N., and K.P. wish to make the disclosure that we are named  
970 inventors in a PCT application (*Vibrio cholerae* protein for use against cancer)  
971 published under No. WO 2021/071419. This does not alter our adherence to  
972 eLife policies on sharing data and materials.

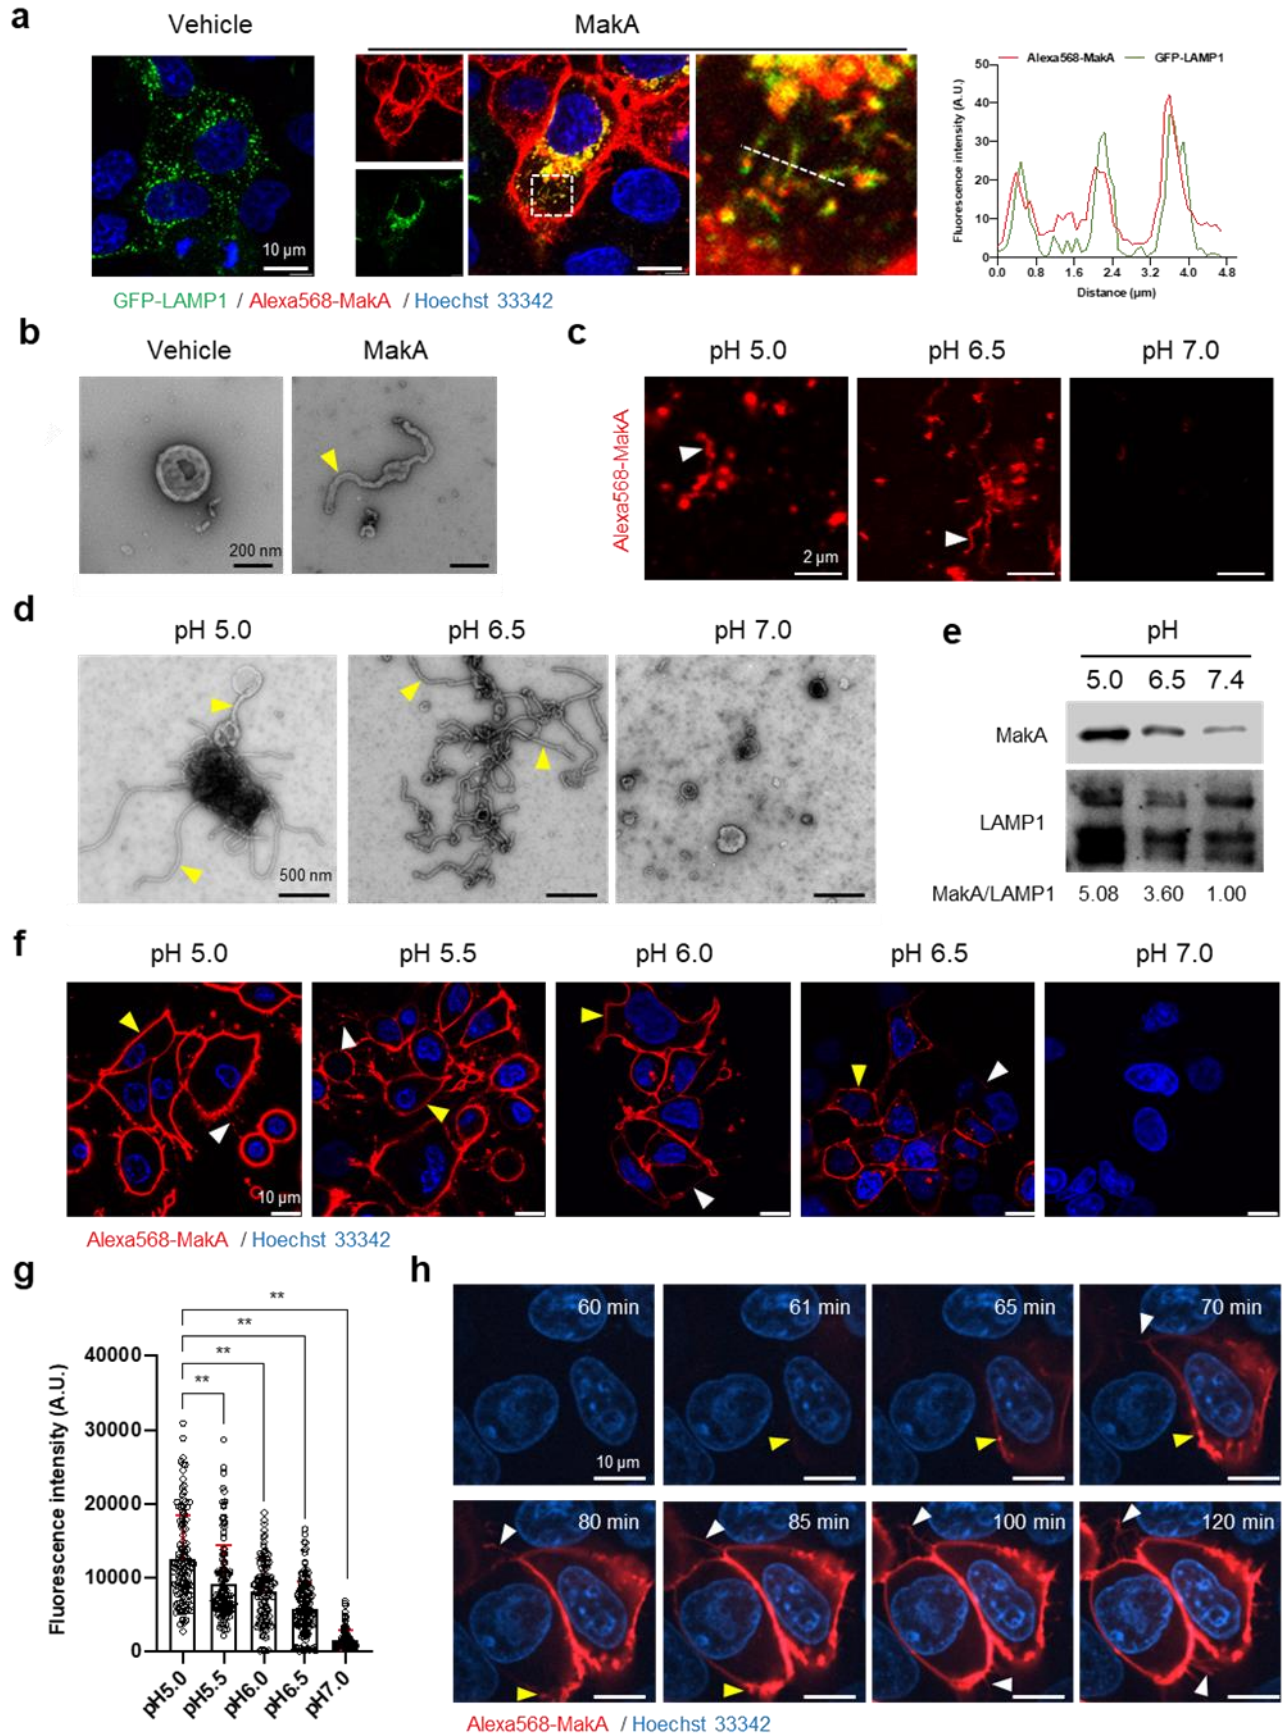

973

974

**Fig. 1: pH-dependent tubulation of lysosomes and binding to epithelial cells by MakA**

975 **a** Caco-2 cells transfected with GFP-LAMP1 were treated with vehicle or Alexa568-MakA (250 nM, 18  
976 h). Nuclei were counterstained with Hoechst 33342. The line graph to the right indicates the  
977 accumulation of Alexa568-MakA in GFP-LAMP1-positive tubular lysosomes. Pearson correlation co-  
978 efficient was used to calculate Alexa568-MakA (red) co-localization with GFP-LAMP1 (green) along with  
979 the tubular structures. Scale bars, 10  $\mu\text{m}$ . **b** Representative electron micrographs of lysosomes purified  
980 from vehicle and MakA (250 nM, 24 h) treated HCT8 cells. Scale bars, 200 nm. The yellow arrowhead  
981 indicates a tubular structure found with lysosomes from MakA-treated cells. **c** The pH-dependent binding  
982 of Alexa568-MakA to purified lysosomes isolated from HCT8 cells: White arrowheads point to the tubular  
983 structures observed with MakA-treated purified lysosomes. Images shown for specimens from different  
984 pH conditions were acquired using the same settings of the microscope. Scale bars, 2  $\mu\text{m}$ . **d**  
985 Representative electron micrographs of purified lysosomes treated with MakA (1  $\mu\text{M}$ ) under different pH  
986 conditions. Yellow arrowheads indicate tubular structures appearing at low pH. Scale bars, 500 nm. **e**  
987 Western blot analysis of samples from lysosome pull-down assays performed with lysosomes treated  
988 with MakA (250 nM, 60 min) under different pH conditions. Lysosome-bound MakA was detected with  
989 anti-MakA antiserum. Immunodetection of LAMP1 was used as a reference and the MakA/LAMP1 ratio  
990 was determined for the quantification of relative MakA amounts. **f** HCT8 cells were exposed to Alexa568-  
991 MakA (500 nM, 4 h) under different pH conditions and visualized live under by confocal microscopy.  
992 Nuclei were counterstained with Hoechst 33342 (blue). Yellow arrowheads indicate cell membrane  
993 association, while white arrowheads indicate MakA-positive tubular structures. The different images  
994 were acquired using the same microscope settings. Scale bars, 10  $\mu\text{m}$ . **g** The histogram indicates  
995 quantification of cell-bound Alexa568-MakA (n = 100 cells) as shown in (f). Data from two independent  
996 experiments are presented as mean  $\pm$  s.e.m.; one-way analysis of variance (ANOVA) with Dunnett's  
997 multiple comparisons test. **\*\***p $\leq$ 0.01. **h** Still images of HCT8 cells exposed to Alexa568-MakA (500 nM)  
998 at pH 5.0. Yellow arrowheads indicate the initial binding site of MakA and white arrowheads indicate the  
999 appearance of MakA-positive tubular structures in a time-dependent manner. Nuclei were  
1000 counterstained with Hoechst 33342. Scale bars, 10  $\mu\text{m}$ .

1001

1002 **Source data for figure 1e**; Uncropped MakA-detected membrane.



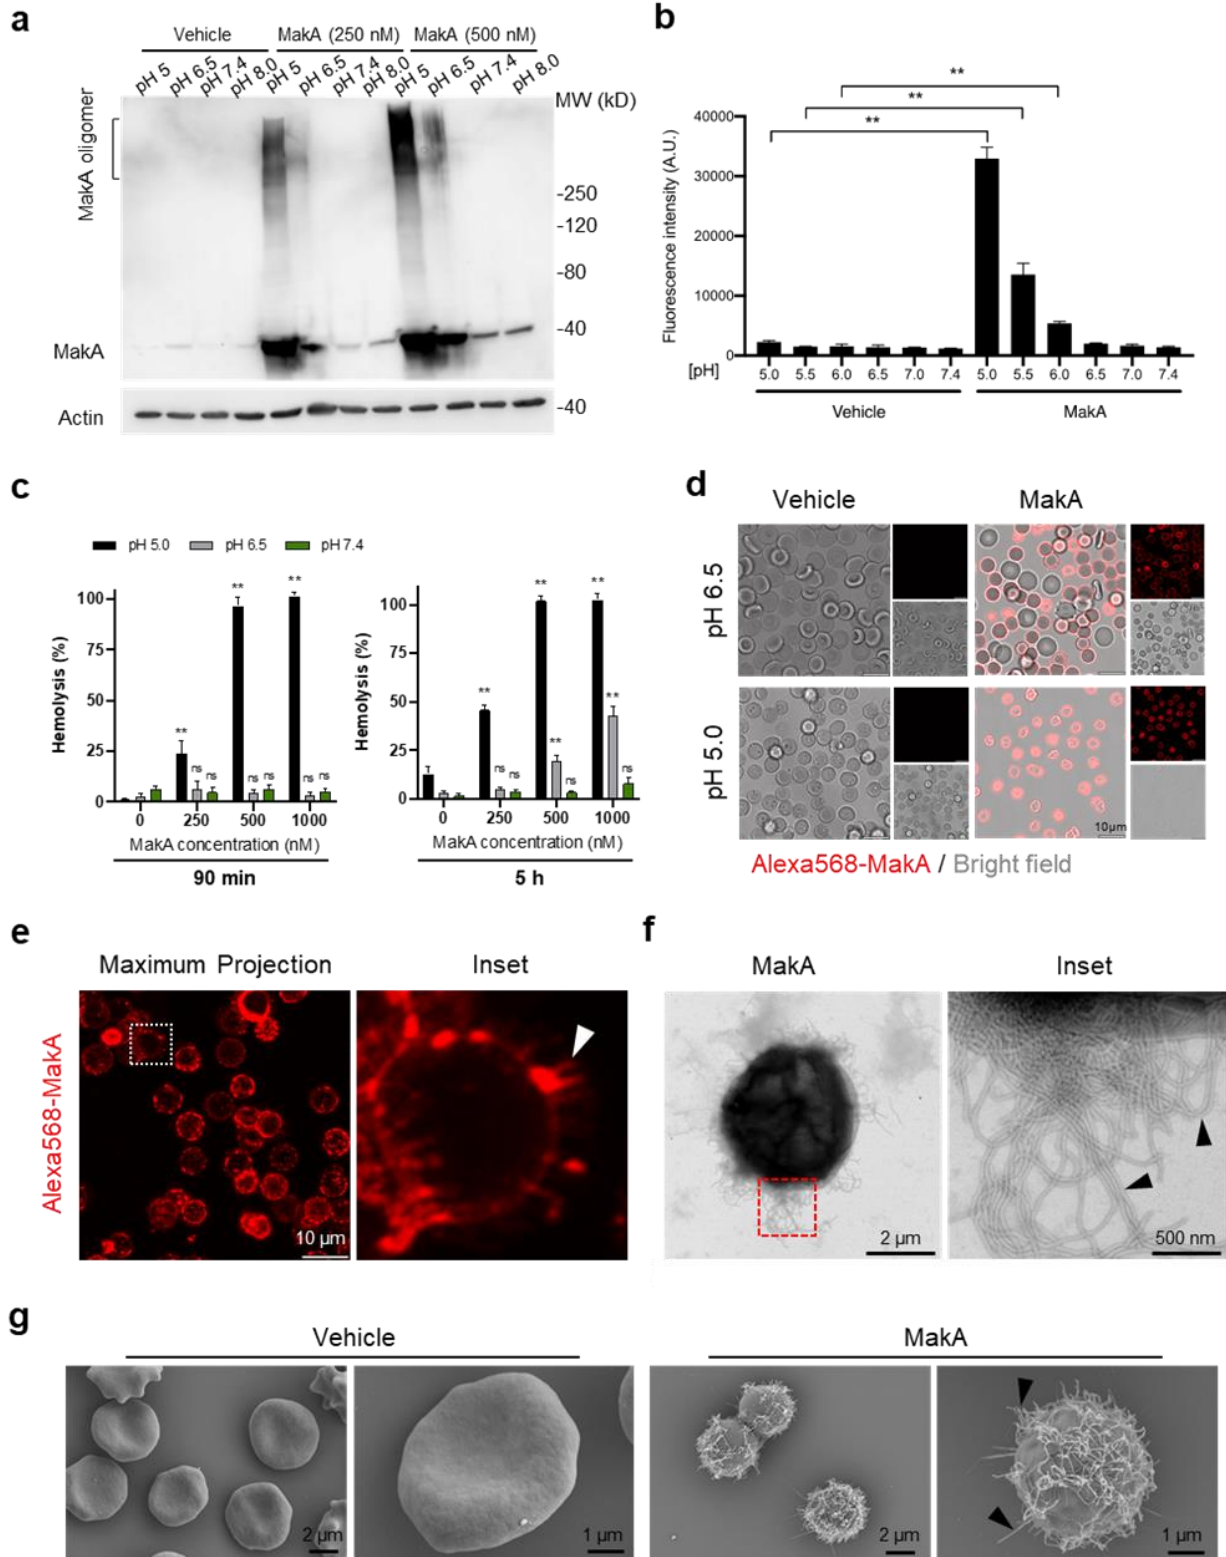

1003

1004

1005

**Fig. 2: pH-dependent MakA binding to target cell membranes and induction of tubulation on erythrocytes.**

1006

**a** Western blot analysis of HCT8 cells treated with increasing concentrations of MakA under different

1007

pH conditions for 4 h. Data are representative of two independent experiments. Cell-bound MakA was

1008

detected with MakA-specific antibodies, and actin was used as a loading control. **b** HCT8 cells were

1009 treated with MakA (500 nM, 4 h) under different pH conditions, and cell toxicity was monitored by  
1010 assaying the uptake of propidium iodide. Fluorescence values for propidium iodide were recorded by  
1011 flow cytometry. Data are representative of three independent experiments; bar graphs show the mean  
1012  $\pm$  s.d. Significance was determined from biological replicates using a non-parametric t-test. **\*\*p** $\leq$ 0.01.  
1013 **c** Human erythrocytes suspended in citrate buffer of different pHs were exposed to increasing  
1014 concentrations of MakA for 90 min (left panel) and 5 h (right panel). MakA-induced hemolysis of  
1015 erythrocytes was normalized against erythrocytes treated with Triton X-100 (0.1%), and data was  
1016 expressed as a percentage (%). Data are representative of six readouts from two independent  
1017 experiments; bar graphs show mean  $\pm$  s.d. Significance was determined from biological replicates using  
1018 a non-parametric t-test. **\*\*p** $\leq$ 0.01, **\*p** $\leq$ 0.05, or ns = not significant. **d** Human erythrocytes (0.25%) in  
1019 phosphate-buffered saline (PBS) were allowed to adhere to the glass surface for 10 h, followed by buffer  
1020 exchange to citrate buffer (pH 5.0 or pH 6.5). The erythrocytes were treated with Alexa568-MakA (500  
1021 nM, 3 h), and cell-bound MakA was detected by confocal microscopy. Scale bars, 10  $\mu$ m. **e** The image  
1022 shows a maximum z-stack projection of the human erythrocytes treated with Alexa568-MakA (pH 6.5 in  
1023 citrate buffer). The white arrowhead in the right panel indicates the accumulation of Alexa568-MakA in  
1024 tubular structures at the surface of erythrocytes. Scale bars, 10  $\mu$ m. **f** Transmission electron microscopy  
1025 (TEM) images of erythrocytes treated with vehicle or MakA (500 nM) for 90 min and stained with 1.5%  
1026 uranyl acetate solution. Black arrowheads in the enlarged part of the image to the right indicate the  
1027 presence of tubular structures present on the surface of the liposome. **g** Scanning electron microscopy  
1028 (SEM) images of erythrocytes treated with MakA (500 nM, 90 min) in citrate buffer (pH 6.5).  
1029 Representative examples of imaged erythrocytes indicate that the formation of tubular structures  
1030 occurred throughout the surface of MakA treated erythrocytes. Scale bars, 2  $\mu$ m.

1031

1032 **Figure 2; source data**

1033 Uncropped western blot membranes



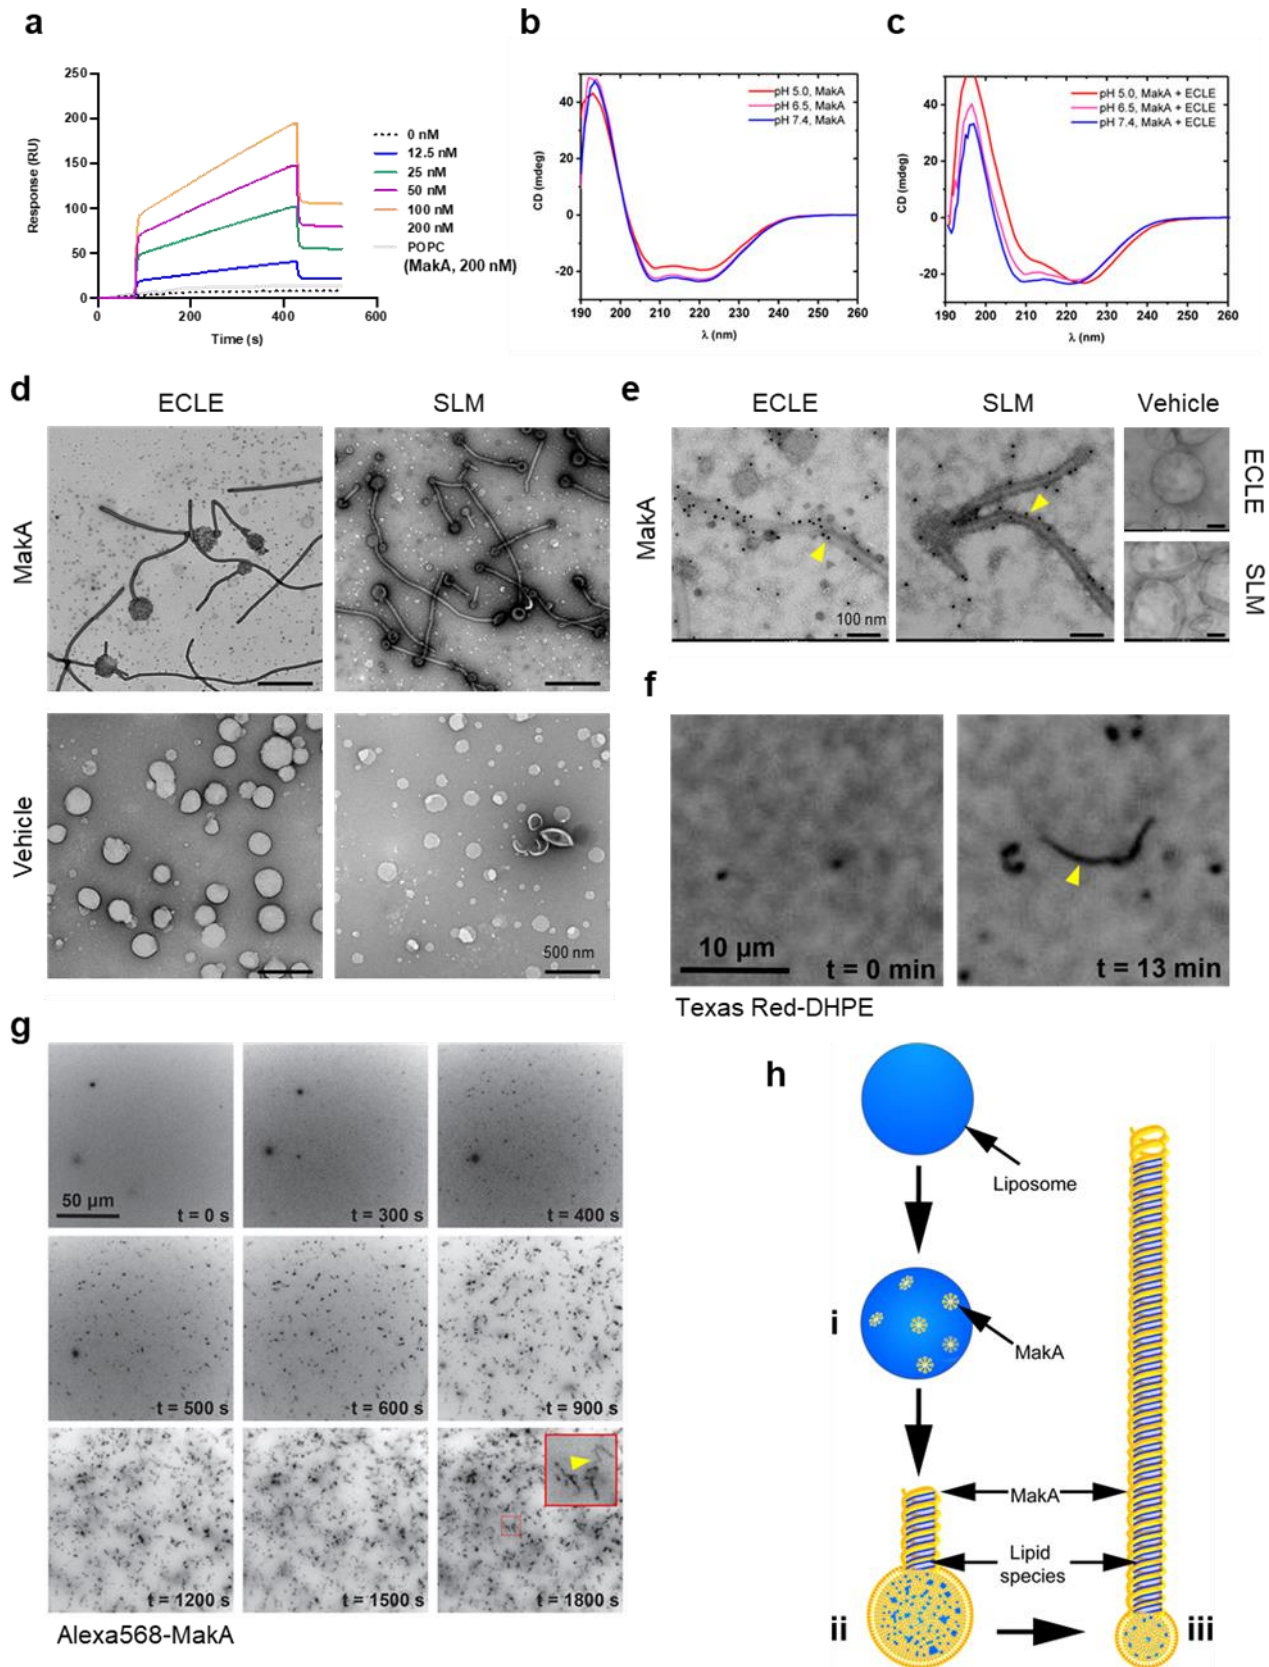

1034  
1035  
1036  
1037

**Fig. 3: pH-dependent formation of protein-lipid tubular structures from MakA interaction with liposomes.**

1038 **a** Surface plasmon resonance (SPR) assay showing direct binding of MakA (0 to 200 nM) to ECLE  
1039 liposomes (120 mM citrate buffer, pH 6.5). The liposomes were immobilized on an SPR sensor chip L1  
1040 (dotted line with 0 nM is buffer control and grey line with immobilized POPC was used as a negative  
1041 control). Control flow cell background was subtracted from the experimental cell before final data  
1042 processing. The  $K_D$  values (49.2 nM) were calculated by using the BioLogic scrubber 2 software. **b** Far-  
1043 UV CD spectra of native MakA of MakA bound to ECLE liposomes under different pH condition. CD  
1044 spectra were recorded in 5 mM citrate buffer using 3  $\mu$ M MakA protein. The absorption intensity  
1045 measured from the control solution, containing buffer only, was subtracted to account for background  
1046 absorption. **d** ECLE or synthetic lipid mixture (SLM) liposomes were treated at pH 6.5 with vehicle (Tris  
1047 20 mM) or MakA (3  $\mu$ M) for 90 min and stained with 1.5% uranyl acetate solution. Images were captured  
1048 with transmission electron microscopy (TEM). White arrowheads indicate tubular structures and blue  
1049 arrowheads indicate MakA oligomeric structures present in the background of liposomes. Scale bars,  
1050 200 nm. **e** The ECLE or SLM liposomes were treated with vehicle (Tris 20 mM) or MakA (3  $\mu$ M) for 90  
1051 min and stained with 1.5% uranyl acetate solution. MakA was detected with anti-MakA antibodies,  
1052 followed by immunogold labeling and imaging by TEM. Scale bars, 200 nm. **f** Selected inverted  
1053 grayscale images from time-lapse epifluorescence microscopy [Movie 1] obtained after incubating SLBs  
1054 (prepared from SLM+TxRed liposomes) with MakA (3  $\mu$ M) at pH 6.5. The fluctuating tubules (yellow  
1055 arrowhead) are visible due to their TxRed-DHPE lipid content. Scale bar, 10  $\mu$ m. **g** Selected inverted  
1056 grayscale images from time-lapse epifluorescence microscopy [Movie 2] obtained after incubating SLBs  
1057 (prepared from SLM liposomes) with Alexa568-MakA (3  $\mu$ M) at pH 6.5. Panels illustrate key steps during  
1058 the transformation of SLBs into fluctuating tubules. Arrowhead (yellow) in the inset indicate appearance  
1059 of a Alexa568-MakA positive tubular structure. Scale bar, 50  $\mu$ m. **h** Schematic representation of how  
1060 MakA insertion into the liposome can result in formation of a MakA- and lipid-positive tubular structure  
1061 under low pH (6.5 or lower) conditions. Upon addition of MakA (yellow) the liposome surface (blue) will  
1062 become covered by the protein (steps i and ii) and the MakA oligomerisation initiates formation of a  
1063 tube-like structure that gradually appears to deplete the liposome of lipids when the protein-lipid tube  
1064 assembly continues to grow in length (step iii).

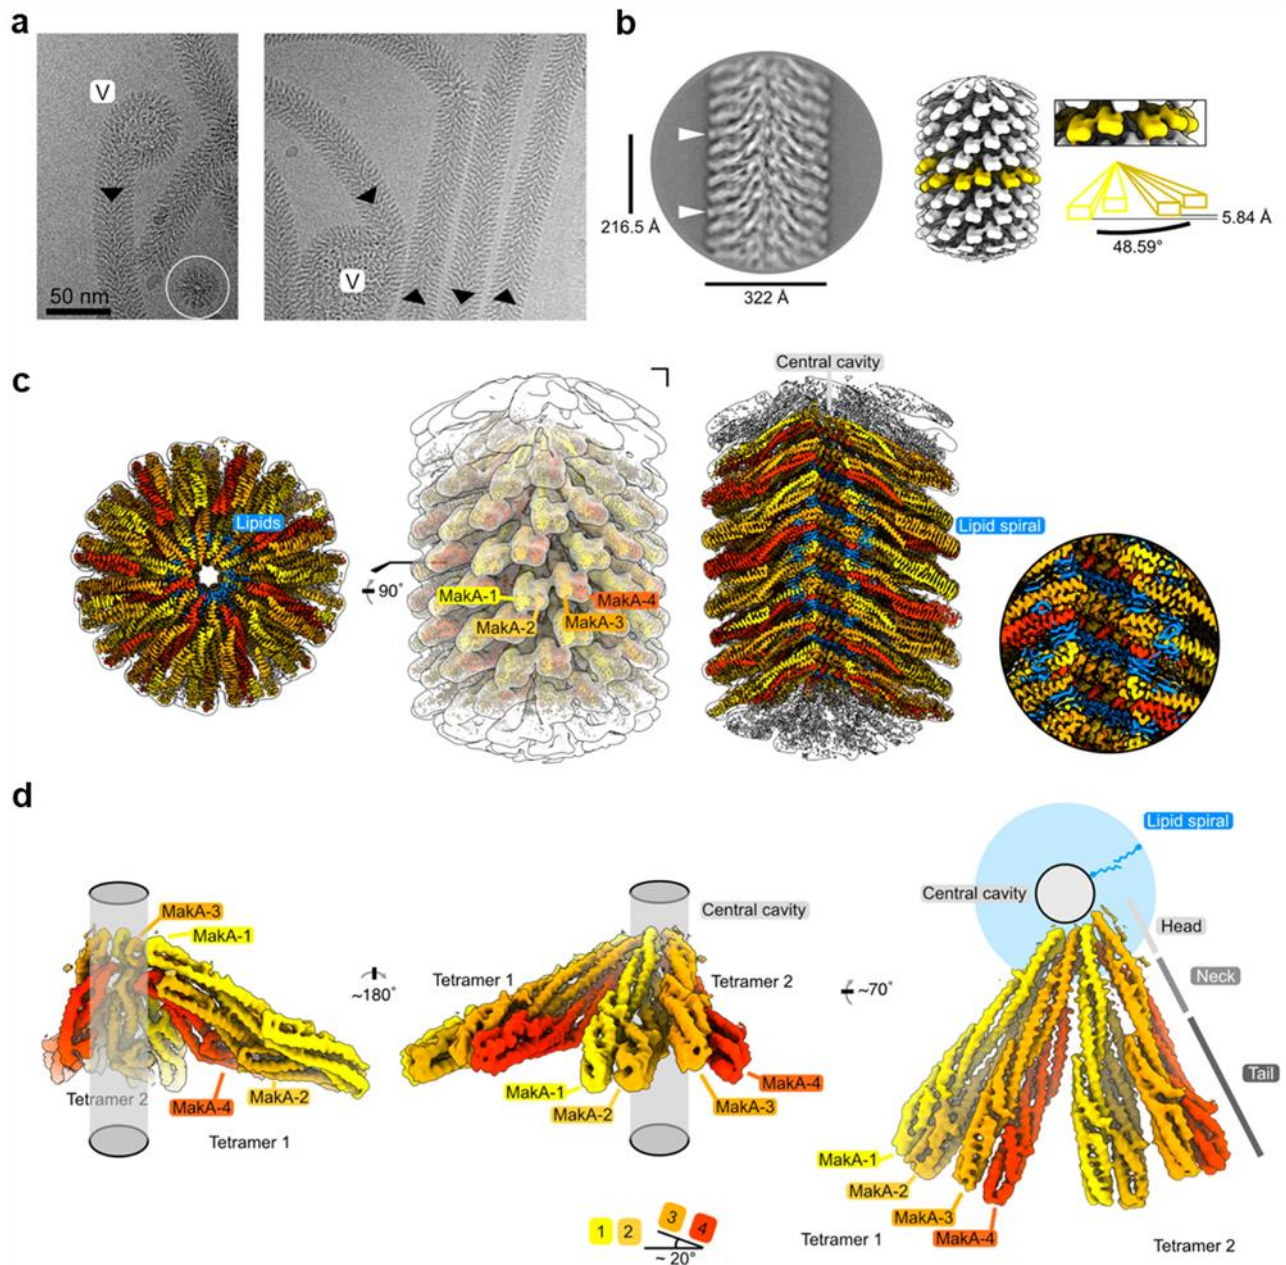

1065

1066

1067

**Fig. 4: Cryo-EM structure of the membrane-bound MakA filament.**

1068

**a** Representative cryo-EM micrograph sections showing MakA filaments emerging from or ending in a

1069

membranous vesicle (V; vesicle). The black arrows indicate the directionality of the filaments. A top-

1070

view of the filamentous tube is visible in the first micrograph within the white circle. **b** A 2D class average

1071

with filament diameter indicated below and the repeat distance labeled on the side. An example of a

1072

visually repeating element is indicated with white arrows. The right side depicts a low-pass filtered cryo-

1073

EM volume with eight repeating subunits colored in gold next to a zoom-in of two blades. A schematic

1074

representation of the two repeating units is visualized underneath the zoom-in with a helical twist

1075

( $48.59^\circ$ ), and rise ( $5.84 \text{ \AA}$ ) indicated. **c** Overall cryo-EM volume (EMD-13185) and slab views of the

1076

MakA filament superimposed onto a semi-transparent, white, 20-Å, low-pass filtered map. The four

1077

MakA subunits, belonging to one tetramer, are colored in shades of gold and orange-red and labeled.

1078 The different densities between the protein blades belonging to a lipid bilayer is colored in blue. **d**  
1079 Rotationally related views of the signal of subtracted and focused-refined cryo-EM volume of two  
1080 tetramers (EMD-13185-additional map 1) are shown with a schematic representation of the central  
1081 cavity (transparent grey) and the lipid spiral (blue). Common structural elements of the alpha-cytolysin  
1082 family protein-fold are indicated in grey (Head, Neck, and Tail). The 20°-rotation of the tail domain  
1083 between two dimers within the asymmetric unit is shown schematically below the central panel.  
1084



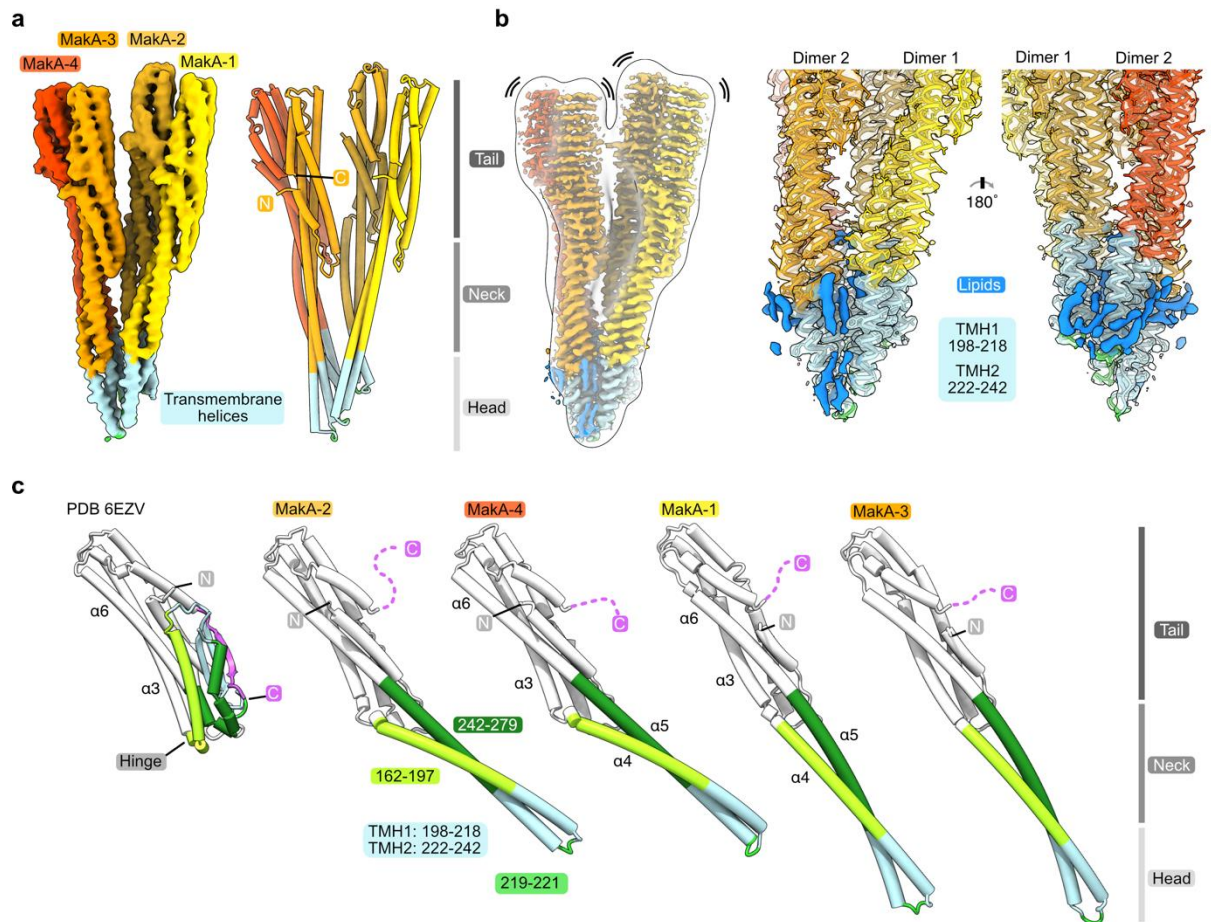

1085

1086

**Fig. 5: Conformational plasticity of MakA in the membrane-bound filamentous state.**

1087

**a** The cryo-EM density of a MakA tetramer (EMD-13185-additional map 1) is shown next to a structural

1088

model. The individual protein domains (Head, Neck and Tail) and the visible N- and C-terminal are

1089

indicated. **b** The cryo-EM density of a MakA tetramer, obtained by helical reconstruction (EMD-13185),

1090

is shown in isolation, colored and oriented as the structural model in (a). The cryo-EM volume is

1091

superimposed with a white, transparent, 20-Å, low-pass filtered volume. Additional density areas in the

1092

transmembrane helix (TMH) region, presumably belonging to lipids, are colored in blue. **c** The crystal

1093

structure of monomeric MakA (PDB-6EVZ<sup>11</sup>) with retracted neck and head domain is shown next to the

1094

four individual subunits of the membrane-bound state of MakA in cartoon representation (PDB-7P3R).

1095

All structural models were superimposed based on the tail region (in white) and displayed in the same

1096

orientation next to each other with increasing length depicting flexing of the neck and head domain as

1097

well as the TMH.

## 1 **Supplementary Information**

2

### 3 **Protein-lipid interaction at low pH induces oligomerisation of the** 4 **MakA cytotoxin from *Vibrio cholerae***

5

6 Aftab Nadeem<sup>1,2,3\*</sup>, Alexandra Berg<sup>1,3,4</sup>, Hudson Pace<sup>2,5,7</sup>, Athar Alam<sup>2,3,5</sup>, Eric Toh<sup>1,2,3</sup>,  
7 Jörgen Ådén<sup>2,6</sup>, Nikola Zlatkov<sup>1,2,3</sup>, Si Lhyam Myint<sup>1,2,3</sup>, Karina Persson<sup>2,6</sup>, Gerhard  
8 Gröbner<sup>2,6</sup>, Anders Sjöstedt<sup>2,3,5</sup>, Marta Bally<sup>2,5,7</sup>, Jonas Barandun<sup>1,3,4</sup>, Bernt Eric  
9 Uhlin<sup>1,2,3\*</sup>, Sun Nyunt Wai<sup>1,2,3\*</sup>

10

11 <sup>1</sup>Department of Molecular Biology, Umeå University, SE-90187 Umeå, Sweden.

12 <sup>2</sup>Umeå Centre for Microbial Research (UCMR), Umeå University, SE-90187 Umeå, Sweden.

13 <sup>3</sup>The Laboratory for Molecular Infection Medicine Sweden (MIMS), Umeå University, SE-90187  
14 Umeå, Sweden.

15 <sup>4</sup>Science for Life Laboratory, Umeå University, Umeå, Sweden

16 <sup>5</sup>Department of Clinical Microbiology, Umeå University, SE-90185, Umeå, Sweden.

17 <sup>6</sup>Department of Chemistry, University of Umeå, SE -901 87, Umeå, Sweden

18 <sup>7</sup>Wallenberg Centre for Molecular Medicine, Umeå University, SE-90185, Umeå, Sweden.

19

20

21 \* Corresponding authors: Aftab Nadeem, e-mail: [aftab.nadeem@umu.se](mailto:aftab.nadeem@umu.se)

22 Bernt Eric Uhlin, e-mail: [bernt.eric.uhlin@umu.se](mailto:bernt.eric.uhlin@umu.se)

23 Sun Nyunt Wai, e-mail: [sun.nyunt.wai@umu.se](mailto:sun.nyunt.wai@umu.se)

24

25

26 Short title: pH-dependent cytolytic MakA activity



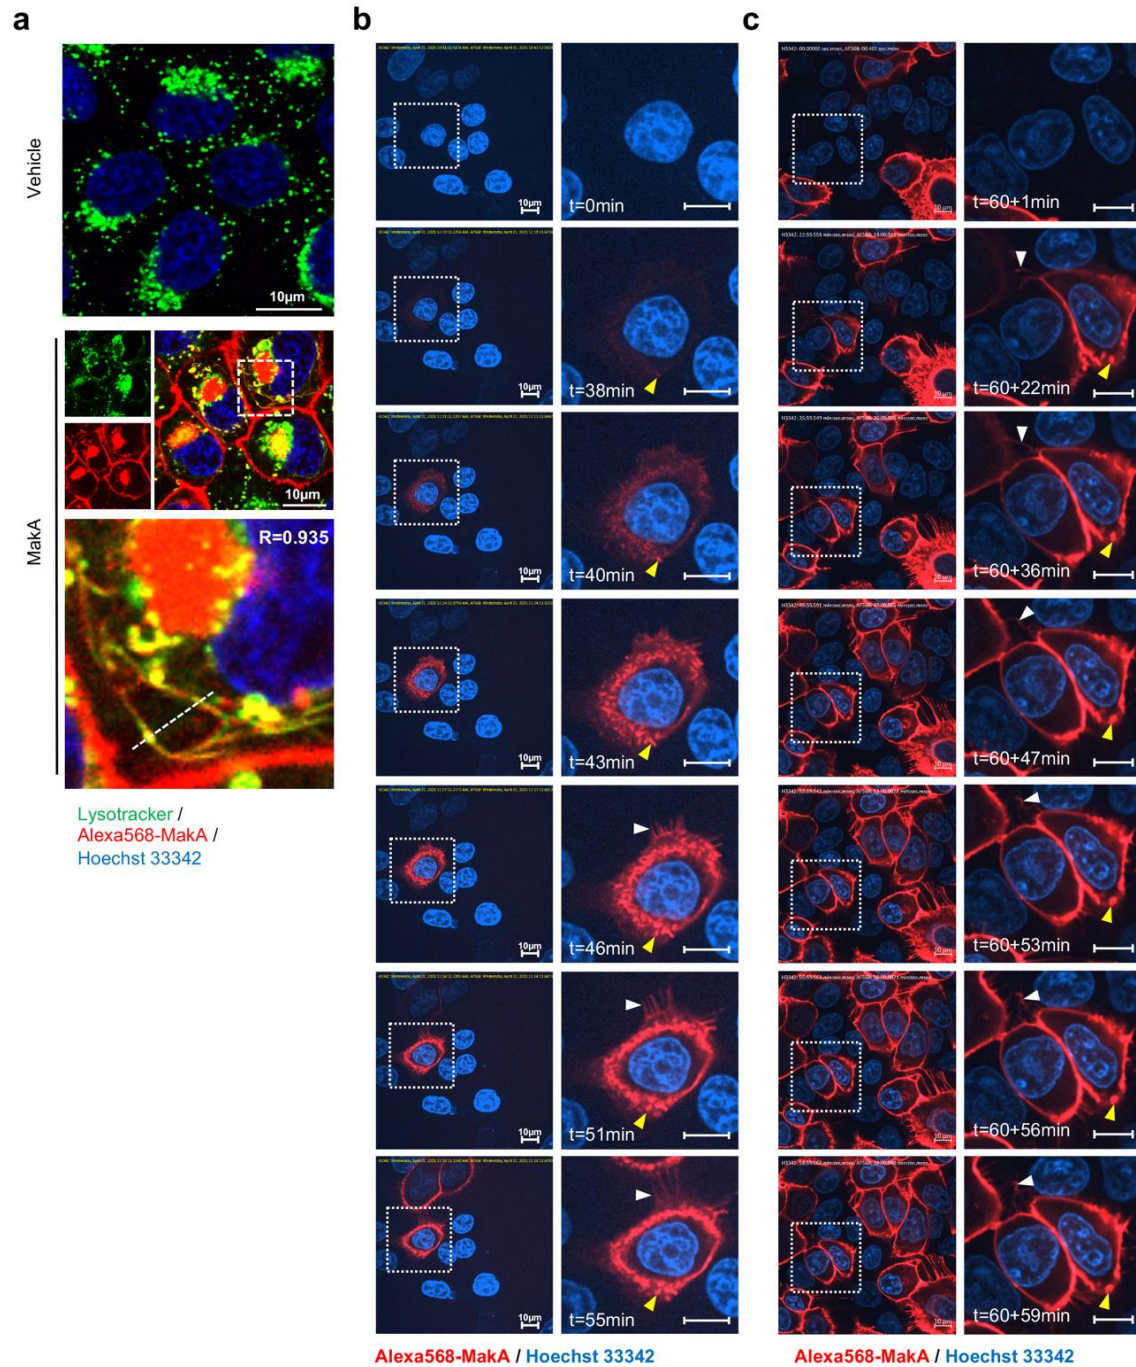

27

28 **Supplementary Fig. 1: MakA binding to the epithelial cell membrane in filipodia rich structures.**

29 **a** Caco-2 cells treated with vehicle or Alexa568-MakA (250 nM, 18 h) and subsequently counterstained  
 30 with Lysotracker (green, 500 nM, 30 min). Nuclei were counterstained with Hoechst 33342. Pearson  
 31 correlation co-efficient was used for the calculation of Alexa568-MakA (red) co-localization with  
 32 lysotracker (green) along the dotted line. Scale bars, 10  $\mu\text{m}$ . **b-c** Still images of HCT8 cells exposed to  
 33 Alexa568-MakA (500 nM) at pH 5.0. Yellow arrowheads indicate the accumulation of MakA in filipodia  
 34 rich structures and white arrowheads indicate the appearance of MakA positive tubular structures.  
 35 Nuclei were counterstained with Hoechst 33342. Scale bars, 10  $\mu\text{m}$ . Images in (a) were acquired for a

- 36 time limit of 55 min immediately after Alexa568-MakA administration, while images in (b) were acquired  
37 for 59 extra minutes, 60 min (Total time = 119 min) after Alexa568-MakA administration.

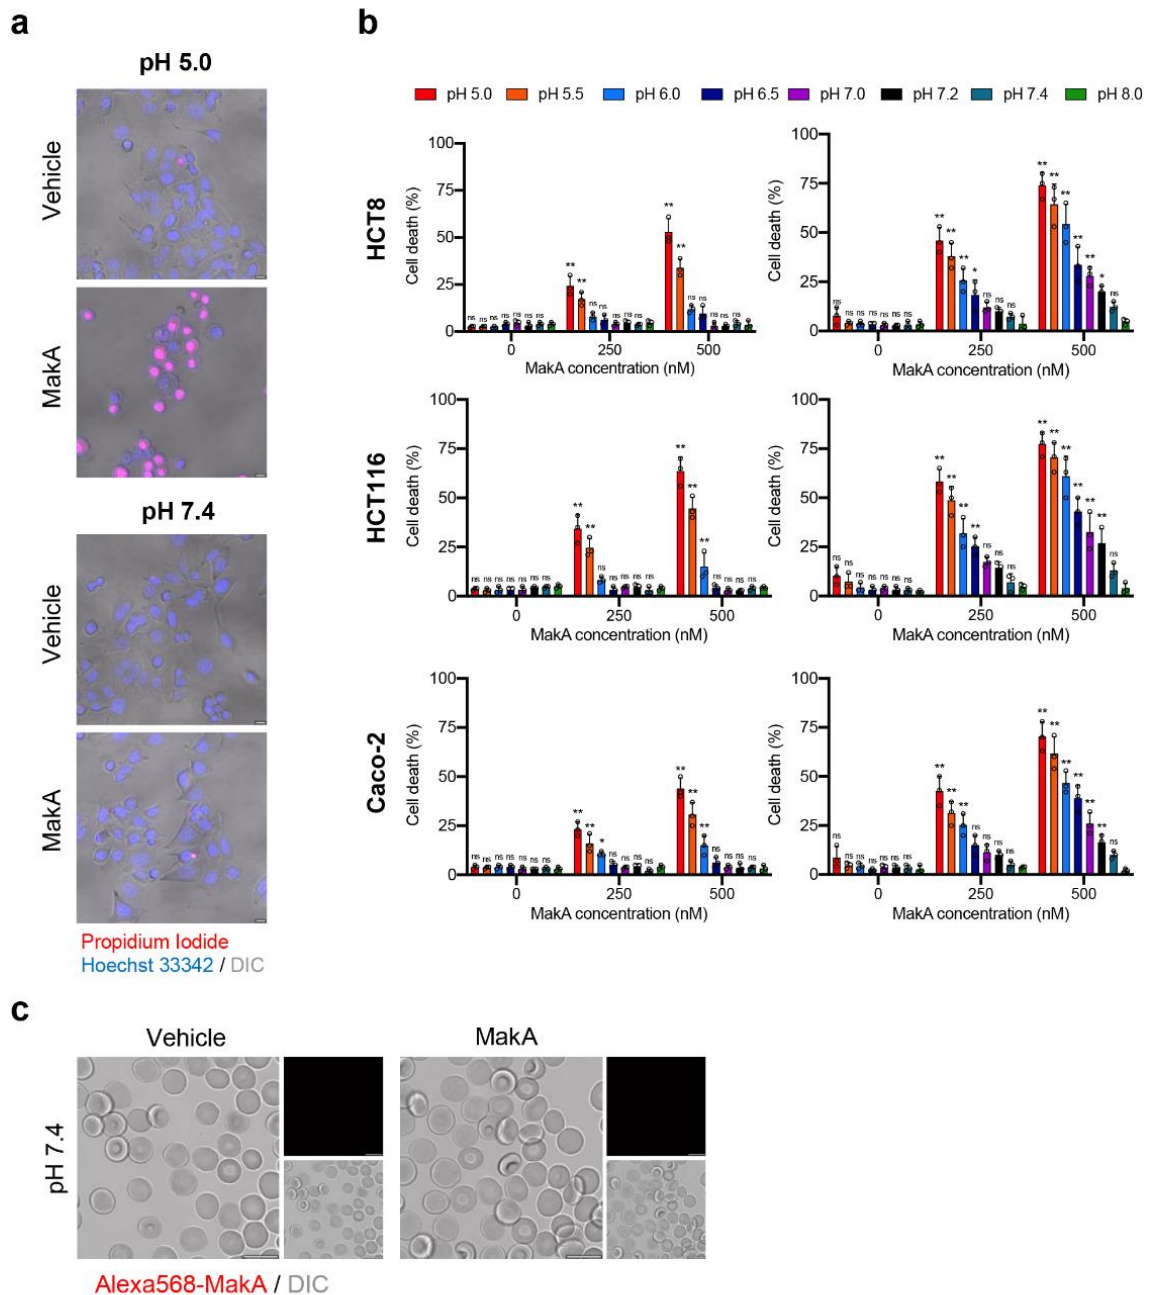

38

39 **Supplementary Fig. 2: pH-dependent cytotoxicity of MakA in target cells.**

40 **a** MakA caused pH-dependent permeability of HCT8 cells as determined by cellular uptake of propidium  
41 iodide. The uptake of propidium iodide (red) was assessed by confocal microscopy. Scale bars, 10  $\mu$ m.

42 **b** MakA induced death of Caco-2, HCT116 and HCT8 cells under different pH conditions. Epithelial cell  
43 viability was assessed using the Trypan blue exclusion method. Data are representative of three  
44 independent experiments; bar graphs show mean  $\pm$  s.d. Significance was determined from biological  
45 replicates using two-way analysis of variance (ANOVA) with Tukey's multiple comparisons test. \* $p \leq 0.05$ ,  
46 \*\* $p \leq 0.01$ , ns = not significant. **c** Human erythrocytes (0.25 %) in phosphate buffered saline (PBS) were  
47 allowed to adhere on the glass surface for 10 h, followed by buffer exchange to citrate buffer (pH 7.4).



48 The erythrocytes were treated with Alexa568-MakA (500 nM, 3 h), and cell-bound MakA was detected  
 49 by confocal microscopy. Scale bars, 10  $\mu$ m.  
 50

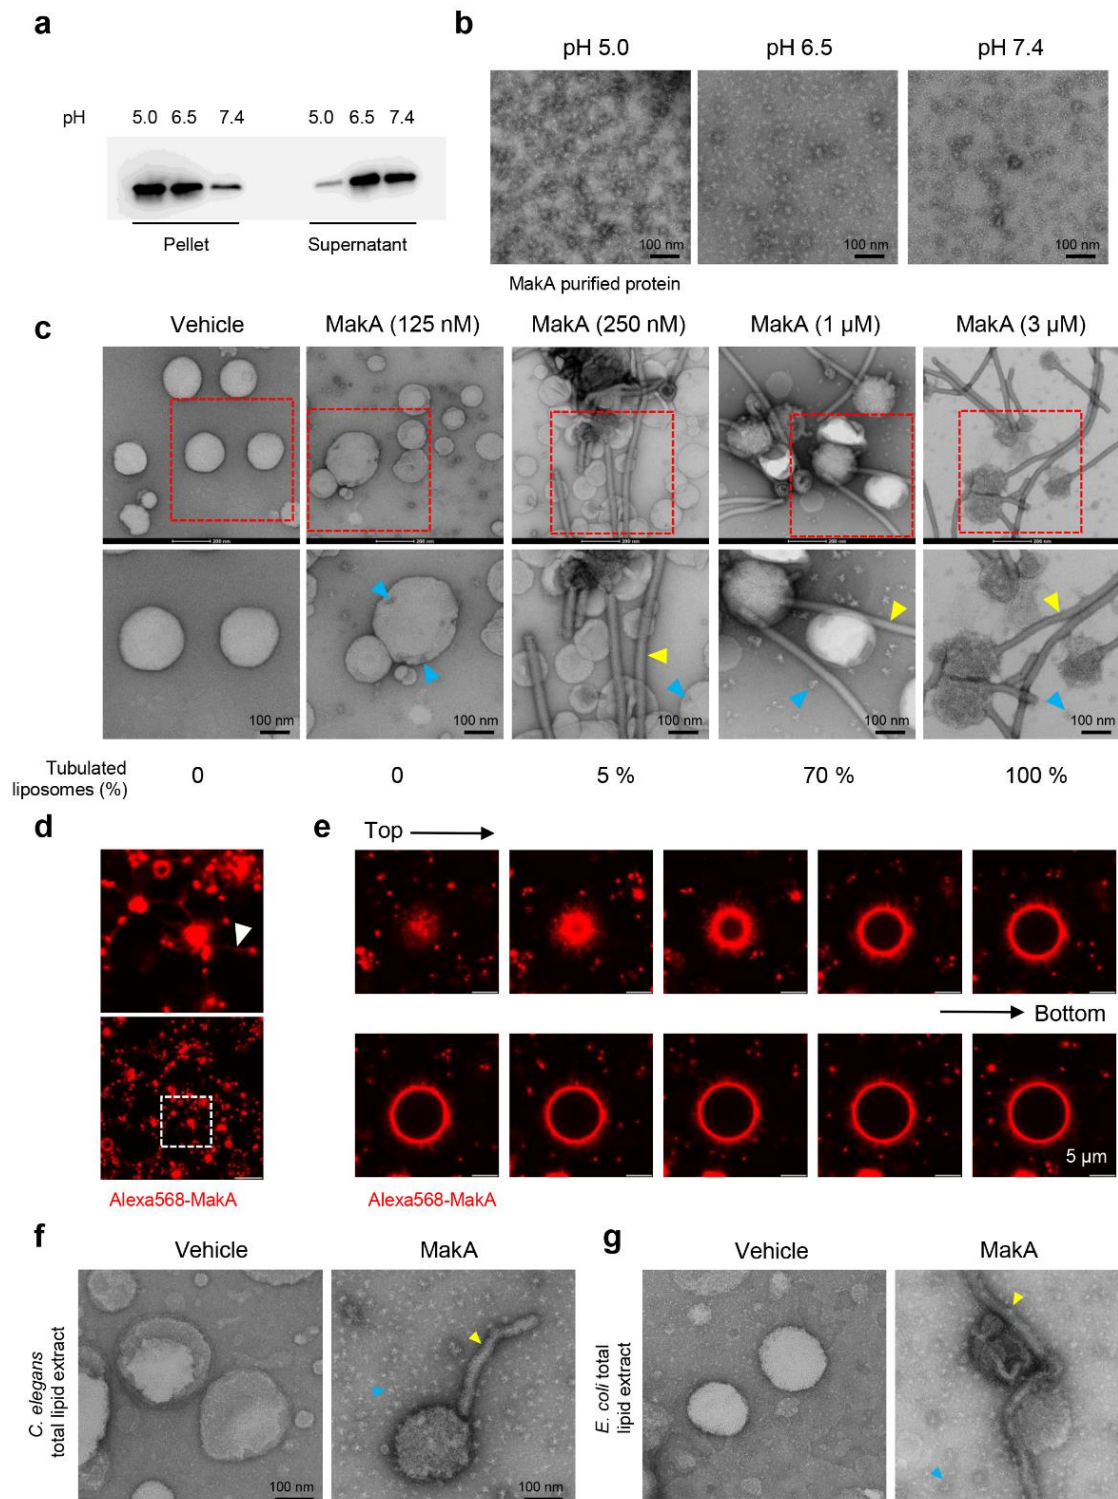

51  
 52

53 **Supplementary Fig. 3: MakA binding to ECLE liposomes and induction of tubulation in a pH-**  
 54 **dependent manner**

55 **a** Western blot analysis of ECLE liposome-bound MakA detected with anti-MakA antisera. MakA protein  
56 (128 nM) was incubated under different pH conditions with liposomes prepared from epithelial cell lipid  
57 extract. S = supernatant and P = pellet. **b** EM micrographs of MakA protein (10  $\mu$ M) that was incubated  
58 at 37°C for 1 h in 120 mM citrate buffer, adjusted to pH 5.0, pH 6.5 and pH 7.4, respectively. The protein  
59 samples were spotted on grids and stained with 1.5 % uranyl acetate solution. Images were captured  
60 with transmission electron microscopy (TEM). MakA appeared as oligomers of varying size under the  
61 different pH conditions. Scale bars, 100 nm. **c** ECLE liposomes were treated with increasing  
62 concentration of MakA for 90 min and stained with a 1.5 % uranyl acetate solution. Images were  
63 captured with TEM. Yellow arrowheads indicate tubular structures, blue arrowheads indicate the  
64 formation of MakA oligomeric structures present nearby or on liposomes. Scale bars, 200 nm and 100  
65 nm. A quantification (%) of liposomes with tubular structures is shown below the micrographs. **d-e** ECLE  
66 liposomes were treated with Alexa568-MakA (1  $\mu$ M, 90 min, pH 6.5). Liposome-bound MakA across the  
67 tubular structure (arrowhead, white) was detected by confocal microscopy. Scale bars, 5  $\mu$ m. Selected  
68 images from z-stack projection of liposome-bound Alexa568-MakA are shown (Top = topmost section,  
69 Bottom = section close to the coverslip). The fraction of large vesicles was less than 1% in the reaction  
70 mixture. **f-g** Liposomes prepared from *C. elegans* or *E. coli* total lipid extracts were treated with MakA  
71 (3  $\mu$ M, 90 min) at pH 6.5. Yellow arrowheads indicate MakA induced tubular structures and blue  
72 arrowheads indicate MakA oligomers. Scale bars, 200 nm and 100 nm.  
73

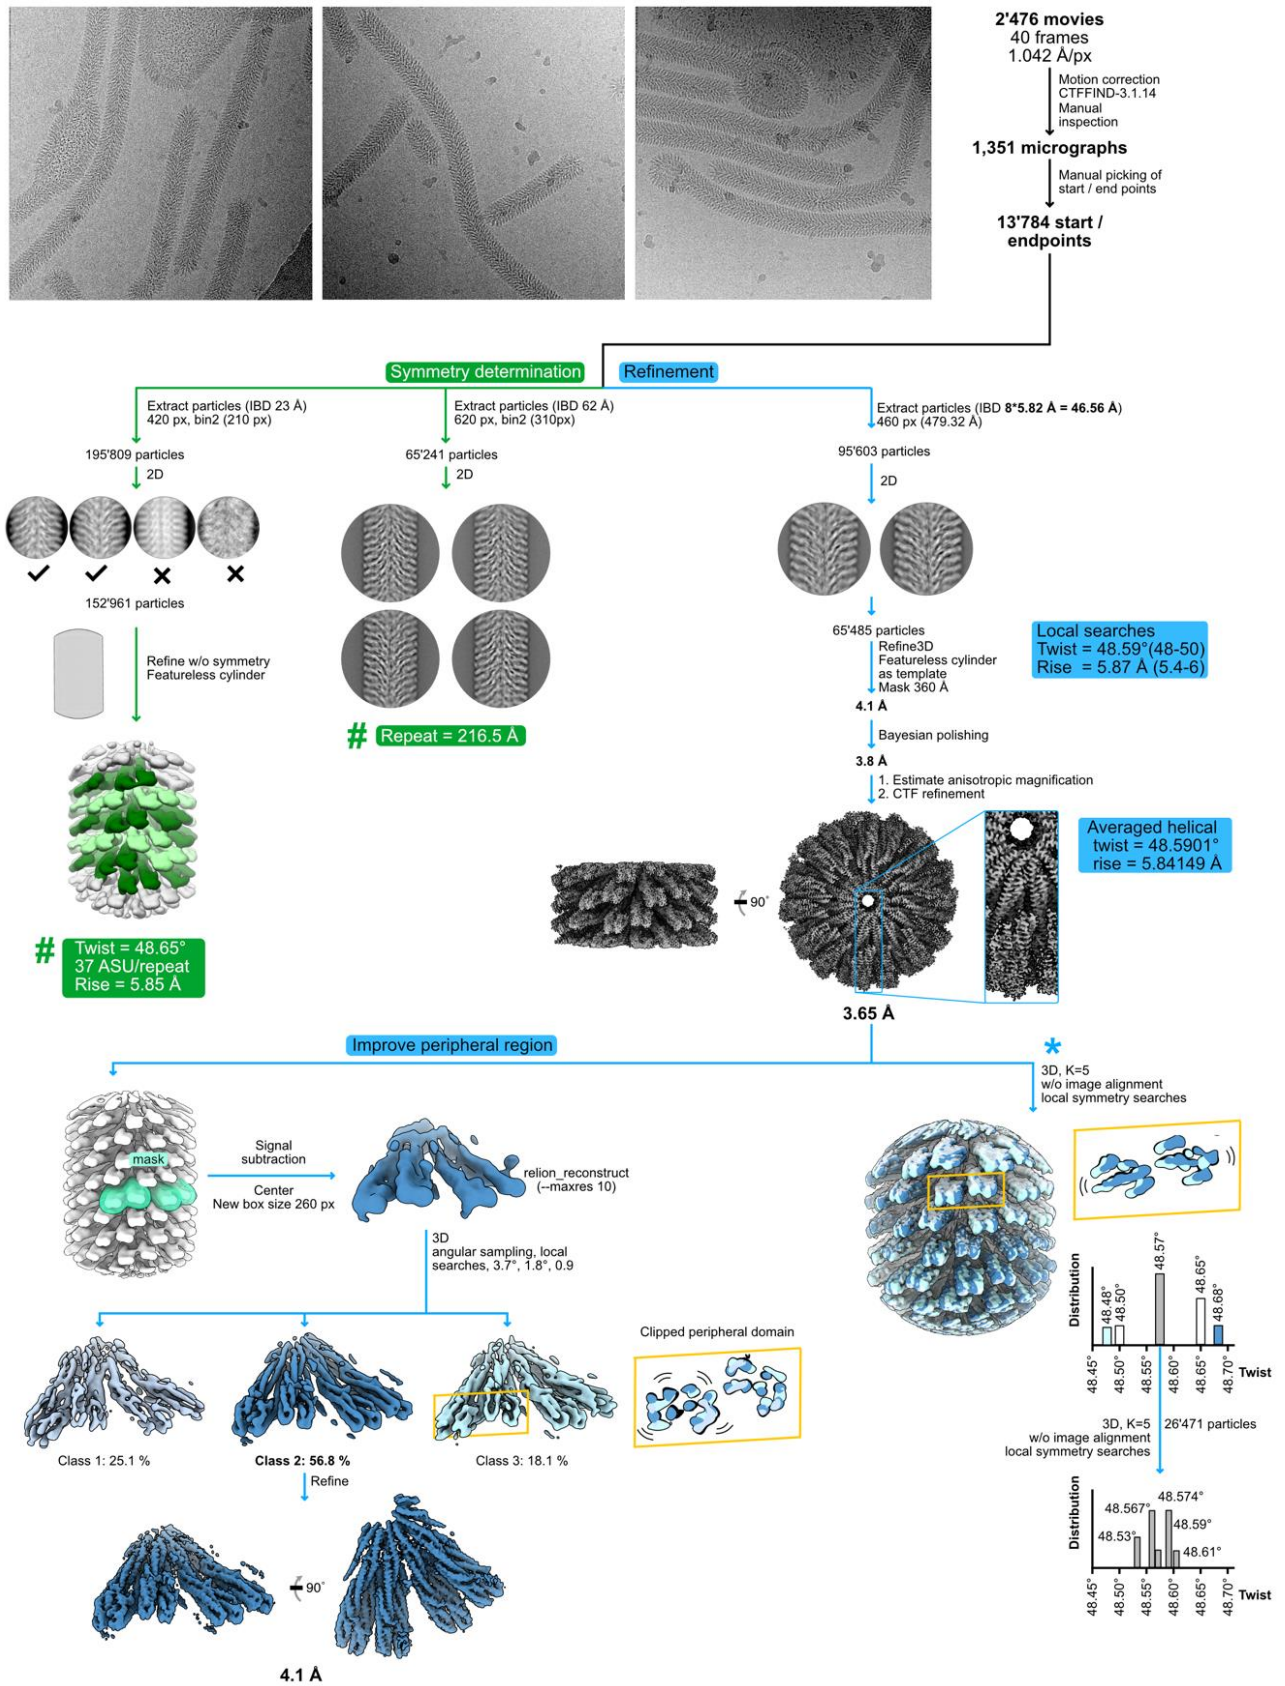

74  
75  
76

**Supplementary Fig. 4: Cryo-EM processing scheme**



77 Three representative micrographs are shown next to a schematic sorting and data processing tree. The  
78 green branch of the tree indicates steps performed to obtain symmetry parameters of the filament, while  
79 the blue branch outlines high-resolution refinement. Within the green branch, the (#) refers to  
80 (Supplementary Fig. 5), which details how the listed symmetry parameters were obtained. The branch  
81 depicted with a (\*) describes two consecutive 3D classification experiments, performed without image  
82 alignment but with local searches of helical symmetry, to analyze the presence of continuous motion or  
83 concrete states in the filament.  
84

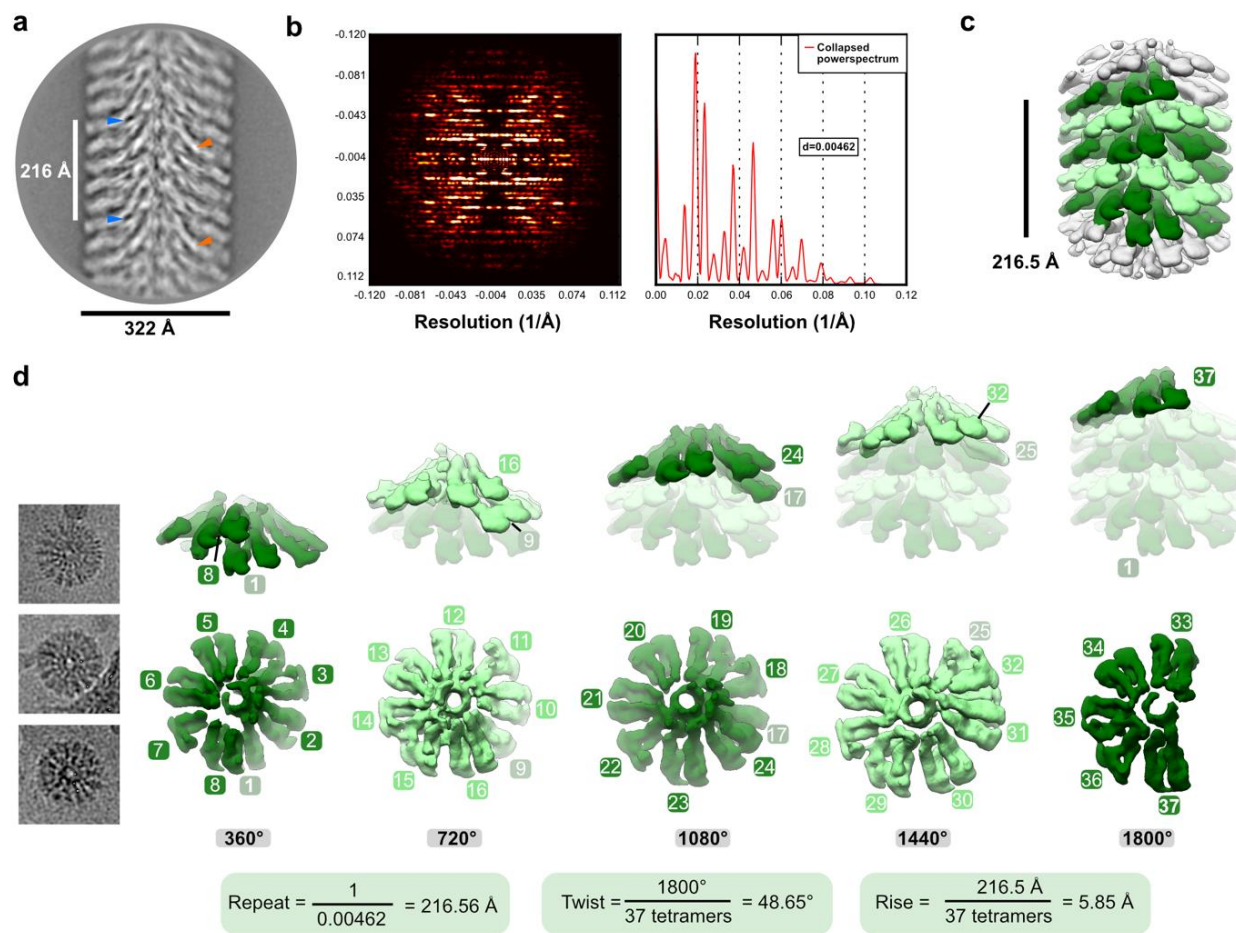

85  
86  
87  
88  
89  
90  
91  
92  
93  
94  
95  
96  
97  
98  
99  
100  
101

**Supplementary Fig. 5: Helical symmetry determination of the MakA-filament.**

**a** A representative 2D class average, obtained from segments extracted with a large box size of 646 Å using RELION-3.1 (ref. 1), is shown. Visual analysis and measurements of the distance between repetitive elements in the 2D class averages (examples indicated with blue or orange arrows) suggest a repeat distance of 216 Å. **b** Enhanced (left), and corresponding collapsed power spectrum (right, red curve), obtained from the class average shown in (a) using SPRING-0.86 (ref. 2), confirms a repeat distance of ~216 Å. **c** A volume, obtained by refining well-defined class averages showing high resolution features without symmetry in RELION-3.1, is shown 20 Å low-pass filtered with one repeat colored in shades of green. **d** Three filament top views, cut out from micrographs, are shown next to a dissection of the volume depicted in (c). The five turns, constituting one repeat, are demonstrated individually, starting with the first (left) and ending with the last turn (right). The lower row visualizes a top view of each turn with individual repetitive segments numbered. The top row shows the corresponding turns in a side view in solid colors, superimposed with a transparent filament. The resulting calculated symmetry parameters are shown below the dissected repeat.

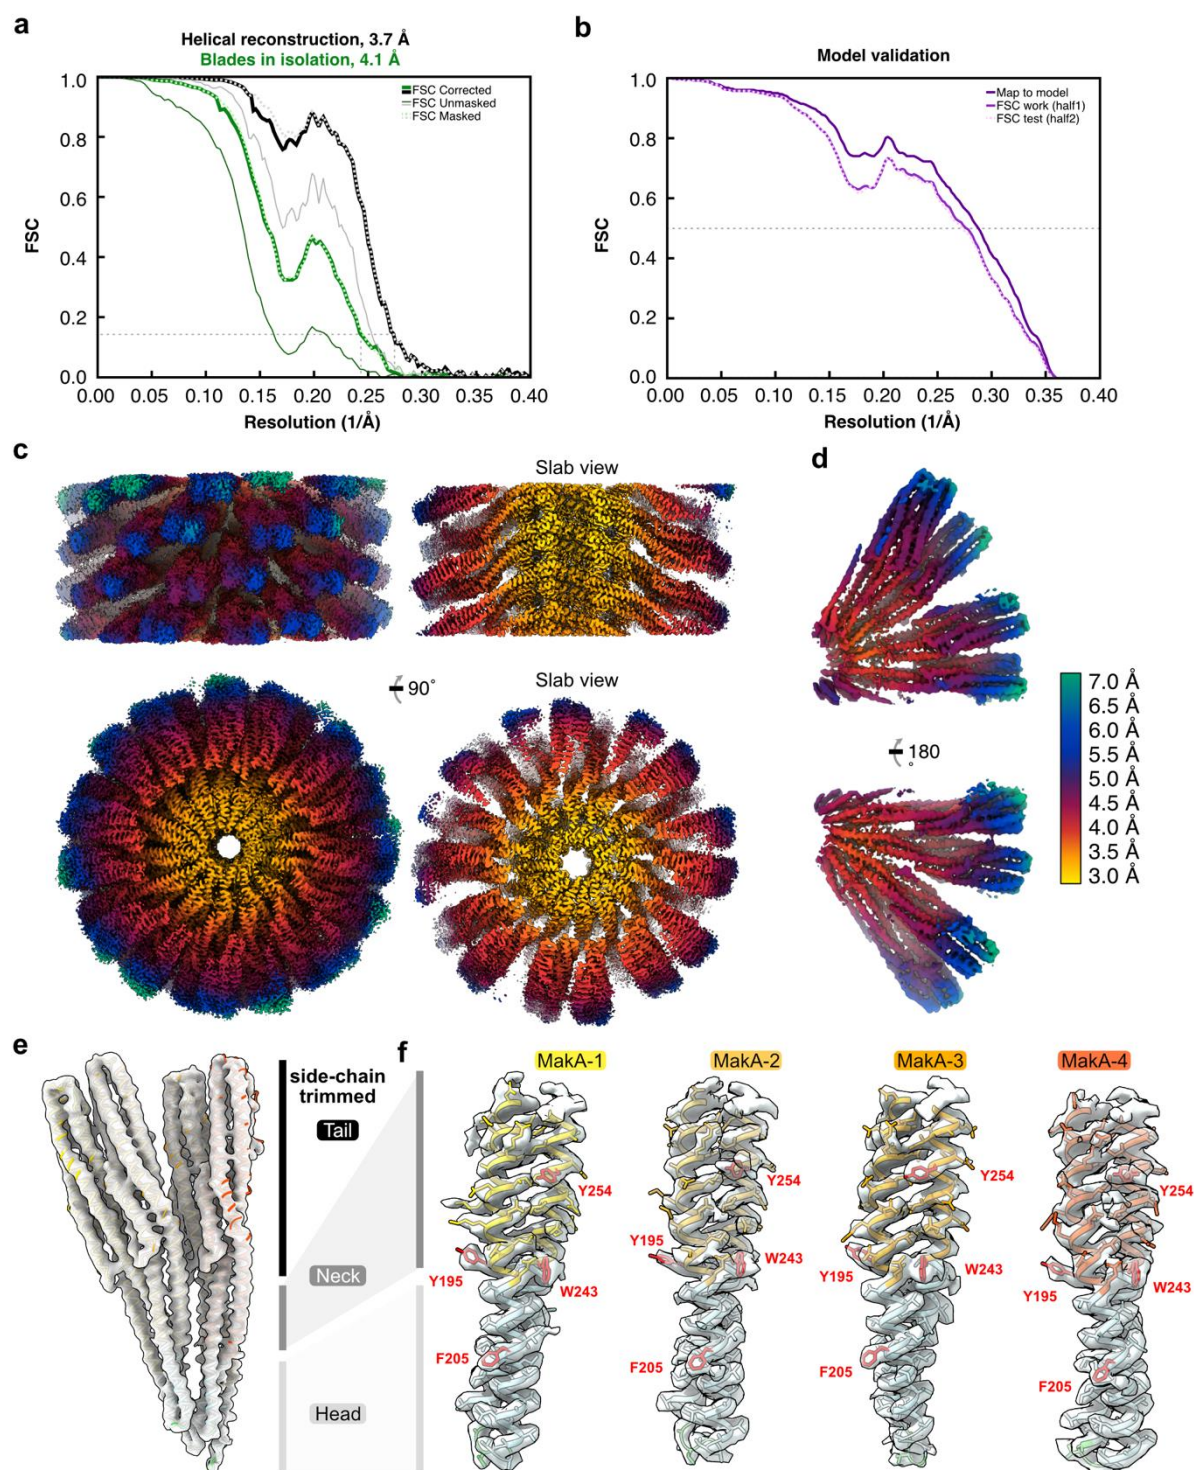

102  
103  
104  
105  
106  
107  
108  
109  
110

**Supplementary Fig. 6: Global and local resolution estimation, model validation, and density fit.**

**a** The Fourier Shell Correlation (FSC) curves, obtained from RELION-3.1 (ref. 1), are shown for the helical reconstruction (EMD-13185) and the two tetramers refined in isolation (EMD-13185-additional map 1). An FSC value of 0.143 is indicated with a thin dashed line. **b** Cross-validation of the final refined model and map (dark-purple line) and a modified “scrambled” model (random displacement of all atoms by 0.5 Å), refined against 50% of the data, compared against half map 1 (solid purple line) or the independent half map 2 (dashed light-purple line). A thin dashed line indicates an FSC value of 0.5. **c**

111 Two 90-degree related views of the helical reconstruction are shown from the side and the top, next to  
112 two slab views. **d** Two 180-degree related views of the two tetramers refined in isolation are visualized.  
113 The cryo-EM densities in (c,d) are colored according to local resolution, which was estimated using  
114 RELION-3.1 and visualized in UCSF ChimeraX (ref. <sup>3</sup>). **e,f** The overall model to density fit between the  
115 final refined model (PDB-7P3R) and (e) the 4.1 Å cryo-EM map (EMD-13185-additional map 1) or (f)  
116 sections of the peripheral Head and Neck domains of the 3.7 Å map (EMD-13185). The individual copies  
117 of MakA are colored in shades of red and orange with the transmembrane domains highlighted blue.  
118 Selected bulky residues are indicated and labeled with amino acid code and residue number in red.  
119

120 **Supplementary Table 1. Cryo-EM data collection, refinement and model statistics.**  
 121  
 122

|                                           | <b>MakA helical reconstruction</b> | <b>MakA, tetramers<sup>123</sup><br/>in isolation<sup>124</sup><br/><sup>125</sup></b> |
|-------------------------------------------|------------------------------------|----------------------------------------------------------------------------------------|
|                                           | EMD-13185                          | EMD-13185-<br>additional map 1                                                         |
|                                           | PDB-7P3R                           |                                                                                        |
| <b>Data collection and processing</b>     |                                    |                                                                                        |
| Voltage (kV)                              | 300                                | 300                                                                                    |
| Pixel Size (Å)                            | 1.042                              | 1.042                                                                                  |
| Electron exposure (e-/Å <sup>2</sup> )    | 43                                 | 43                                                                                     |
| Defocus range (µm)                        | 0.7 – 2.5                          | 0.7 – 2.5                                                                              |
| Frames                                    | 40                                 | 40                                                                                     |
| Symmetry imposed                          |                                    | C1                                                                                     |
| Helical twist (°)                         | 48.59                              | -                                                                                      |
| Helical rise (Å)                          | 5.84                               | -                                                                                      |
| Initial particle images                   | 95'603                             | 95'603                                                                                 |
| Final particle images                     | 65'485                             | 37'876                                                                                 |
| Resolution (Å)                            | 3.7                                | 4.1                                                                                    |
| FSC threshold                             | 0.143                              | 0.143                                                                                  |
| Map sharpening B-Factor (Å <sup>2</sup> ) | -99.9                              | -117                                                                                   |
| <b>Refinement</b>                         |                                    |                                                                                        |
| Initial model used                        | 6EZV                               | 6EZV                                                                                   |
| Model composition                         |                                    |                                                                                        |
| Non hydrogen Atoms                        | 7'738                              |                                                                                        |
| Protein residues                          | 1'338                              |                                                                                        |
| R.m.s deviations                          |                                    |                                                                                        |
| Bond length (Å)                           | 0.0069                             |                                                                                        |
| Angles (°)                                | 1.17                               |                                                                                        |
| Validation                                |                                    |                                                                                        |
| MolProbity score                          | 1.08                               |                                                                                        |
| Clashscore                                | 1.88                               |                                                                                        |
| Poor rotamers (%)                         | 0.28                               |                                                                                        |
| Ramachandran                              |                                    |                                                                                        |
| Favored (%)                               | 97.29                              |                                                                                        |
| Allowed (%)                               | 2.71                               |                                                                                        |
| Outliers (%)                              | 0.00                               |                                                                                        |



126  
127

## References

- 128 1. Zivanov J, *et al.* New tools for automated high-resolution cryo-EM structure  
129 determination in RELION-3. *Elife* **7**, (2018).  
130  
131 2. Desfosses A, Ciuffa R, Gutsche I, Sachse C. SPRING - an image processing package  
132 for single-particle based helical reconstruction from electron cryomicrographs. *J*  
133 *Struct Biol* **185**, 15-26 (2014).  
134  
135 3. Goddard TD, *et al.* UCSF ChimeraX: Meeting modern challenges in visualization and  
136 analysis. *Protein Sci* **27**, 14-25 (2018).  
137  
138
